# Supplementary material
Source: PubMed Central journal article supplement (PMC1949330)
Supplement: i1466-1268-12-2-172-s01.pdf [file i1466-1268-12-2-172-s01.pdf]

**Supplementary Table 1** This table lists all the proteins used in the phylogenetic analysis (Fig 2). Each protein included in the alignment (Supp Fig 1) is listed with the abbreviation used in the alignment with the full species name and accession number

| Species, HSP70 abbreviation      | Accession number or Proteins ID |
|----------------------------------|---------------------------------|
| <i>Arabidopsis thaliana</i>      |                                 |
| Athsp70-1                        | AT5G02500                       |
| Athsp70-2                        | AT5G02490                       |
| Athsp70-3                        | AT3G09440                       |
| Athsp70-4                        | AT3G12580                       |
| Athsp70-5                        | AT1G16030                       |
| Athsp70-6                        | AT4G24280                       |
| Athsp70-7                        | AT5G49910                       |
| Athsp70-8                        | AT4G37910                       |
| Athsp70-9                        | AT5G09590                       |
| Athsp70-10                       | AT5G28540                       |
| Athsp70-11                       | AT5G42020                       |
| Athsp70-12                       | AT1G09080                       |
| Athsp70-13                       | AT1G56410                       |
| <i>Chlamydomonas reinhardtii</i> |                                 |
| Crhsp70-1                        | 126835                          |
| Crhsp70-2                        | 137452                          |
| Crhsp70-3                        | 185673                          |
| Crhsp70-4                        | 133650                          |
| Crhsp70-5                        | 133859                          |
| <i>Cyanidium caldarium</i>       |                                 |
| Cchsp70-1                        | AAF12906                        |
| <i>Cyanidioschyzon merolae</i>   |                                 |
| Cmhs70-1                         | 5604                            |
| Cmhs70-2                         | 1601                            |
| Cmhs70-3                         | 3804                            |
| Cmhs70-4                         | 914                             |
| <i>Escherichia coli</i>          |                                 |
| DnaK                             | P04475                          |
| <i>Gracilaria tenuistipitata</i> |                                 |
| Gthsp70-1                        | AAT79683                        |
| <i>Guillardia theta</i>          |                                 |
| Guthsp70-1                       | AAC35702                        |
| <i>Odontella sinensis</i>        |                                 |
| Oshsp70-1                        | CAA91650                        |
| <i>Oryza sativa</i>              |                                 |
| Orshsp70-1                       | LOC_Os03gl6920                  |
| Orshsp70-2                       | LOC_Os03gl6860                  |
| Orshsp70-3                       | LOC_Os05g38530                  |
| Orshsp70-4                       | LOC_Os01g62290                  |
| Orshsp70-5                       | LOC_Os11g47760                  |
| Orshsp70-6                       | LOC_Os03g60620                  |
| Orshsp70-7                       | LOC_Os12g14070                  |
| Orshsp70-8                       | LOC_Os05g23740                  |
| Orshsp70-9                       | LOC_Os02g53420                  |
| Orshsp70-10                      | LOC_Os03g02260                  |
| Orshsp70-11                      | LOC_Os09g31486                  |
| Orshsp70-12                      | LOC_Os02g02410                  |
| Orshsp70-13                      | LOC_Os03g50250                  |
| Orshsp70-14                      | LOC_Os05g30480                  |
| Orshsp70-15                      | LOC_Os08g09770                  |
| Orshsp70-16                      | LOC_Os05g35400                  |
| <i>Ostreococcus lucimarinus</i>  |                                 |
| Olhsp70-1                        | 48839                           |
| Olhsp70-2                        | 15148                           |
| Olhsp70-3                        | 44780                           |
| Olhsp70-4                        | 28169                           |
| Olhsp70-5                        | 12592                           |

**Supplementary Table 1** Continued

| Species, HSP70 abbreviation             | Accession number or Proteins ID |
|-----------------------------------------|---------------------------------|
| <i>Ostreococcus tauri</i>               |                                 |
| Othsp70-1                               | 15769                           |
| Othsp70-2                               | 28374                           |
| Othsp70-3                               | 28024                           |
| Othsp70-4                               | 22076                           |
| Othsp70-5                               | 15909                           |
| <i>Plasmodium falciparum</i>            |                                 |
| Pfhs70-1                                | PF08.0054                       |
| Pfhs70-2                                | PF10875W                        |
| Pfhs70-3                                | PF11.O351                       |
| Pfhs70-4                                | PF07.0033                       |
| <i>Plasmodium yoelli</i>                |                                 |
| Pyhs70-1                                | PY05001                         |
| Pyhs70-2                                | PY06158                         |
| Pyhs70-3                                | PY06981                         |
| Phhs70-1                                | ABF20063                        |
| <i>Porphorya haitanensis</i>            |                                 |
| Phhs70-1                                | ABF20063                        |
| <i>Porphorya purpurea</i>               |                                 |
| Pophsp70-1                              | AAC08201                        |
| <i>Porphorya yezoensis</i>              |                                 |
| Poyhs70-1                               | ABF54971                        |
| <i>Saccharomyces cerevisiae</i>         |                                 |
| ECM10                                   | S50429                          |
| SSC1                                    | M27229                          |
| KAR2                                    | M25064                          |
| SSB1                                    | CAA31995                        |
| SSB2                                    | S50721                          |
| SSA1                                    | P10591                          |
| SSA2                                    | P10592                          |
| SSA3                                    | S36753                          |
| SSA4                                    | B36590                          |
| <i>Synechocystis</i> sp. strain PCC6803 |                                 |
| SynDnaK1                                | Q55154                          |
| SynDnaK1                                | P22358                          |
| SynDnaK1                                | P73098                          |
| <i>Thalassiosira pseudonana</i>         |                                 |
| Tphsp70-1                               | YP_874583                       |
| Tphsp70-2                               | 269240                          |
| Tphsp70-3                               | 28189                           |
| Tphsp70-4                               | 269120                          |
| Tphsp70-5                               | 27656                           |

HSP, heat shock protein.

|             |            |             |            |            |            |       |
|-------------|------------|-------------|------------|------------|------------|-------|
| Athsp70-1   | GIDLGTTYSC | VGWQHDRVE   | IIANDQGNRT | TPSYVAFTDS | ERLIGDAAKN | [ 50] |
| Athsp70-2   | GIDLGTTYSC | VGWQHDRVE   | IIANDQGNRT | TPSYVAFTDS | ERLIGDAAKN | [ 50] |
| Athsp70-3   | GIDLGTTYSC | VGWQHDRVE   | IIANDQGNRT | TPSYVAFTDS | ERLIGDAAKN | [ 50] |
| Athsp70-4   | GIDLGTTYSC | VGWQHDRVE   | IIANDQGNRT | TPSYVAFTDS | ERLIGDAAKN | [ 50] |
| Athsp70-5   | GIDLGTTYSC | VGWVMDRVE   | IIPNDQGNRT | TPSYVAFTDT | ERLIGDAAKN | [ 50] |
| Orhsp70-5   | GIDLGTTYSC | VGWQHDRVE   | IIANDQGNRT | TPSYVGFTDS | ERLIGDAAKN | [ 50] |
| Orhsp70-3   | GIDLGTTYSC | VGWQHDRVE   | IIANDQGNRT | TPSYVAFTDT | ERLIGDAAKN | [ 50] |
| Orhsp70-6   | GIDLGTTYSC | VGWQHDRVE   | IIANDQGNRT | TPSYVGFTDT | ERLIGDAAKN | [ 50] |
| Orhsp70-1   | GIDLGTTYSC | VGWQHDRVE   | IIANDQGNRT | TPSYVAFTDT | ERLIGDAAKN | [ 50] |
| Crhsp70-3   | GIDLGTTYSC | VGWQHDRVE   | IIANDQGNRT | TPSYVAFTDT | ERLIGDAAKN | [ 50] |
| Olhsp70-4   | GIDLGTTYSC | VGWQHDRVE   | IIANDQGNRT | TPSYVAFTDS | ERLIGDSAKN | [ 50] |
| Othsp70-5   | GIDLGTTNSA | VAAMEGGSPT  | IVTNAEGGRT | TPSVVAYTKS | DRLVGQIAKR | [ 50] |
| Tphsp70-4   | GIDLGTTYSC | VGWQHDRVE   | IIANDQGNRT | TPSYVAFTET | ERLIGDAAKS | [ 50] |
| Pfhsp70-2   | GIDLGTTYSC | VGVFKNGRVE  | ILNNELGRI  | TPSYVSFVDG | ERKVGEAAKL | [ 50] |
| ScSCSSA1    | GIDLGTTYSC | VAHFANDRVD  | IIANDQGNRT | TPSFVAFTDT | ERLIGDAAKN | [ 50] |
| ScSCSSA2    | GIDLGTTYSC | VAHFSNDRVD  | IIANDQGNRT | TPSFVGFTDT | ERLIGDAAKN | [ 50] |
| ScSCSSA3    | GIDLGTTYSC | VAHFSNDRVE  | IIANDQGNRT | TPSYVAFTDT | ERLIGDAAKN | [ 50] |
| SCSCSSA4    | GIDLGTTYSC | VAHFANDRVE  | IIANDQGNRT | TPSYVAFTDT | ERLIGDAAKN | [ 50] |
| Cmhsp70-3   | GIDLGTTYSC | VAVMEGNKVE  | IIANEQGNRT | TPSYVAFTET | ERLIGDAAKN | [ 50] |
| Pyhsp70-3   | GIDLGTTNSC | VAIMEGKQGK  | VIENAEGFRT | TPSVVAFTND | QRLVGIVAKR | [ 50] |
| Athsp70-11  | GIDLGTTYSC | VGVIKNGHVE  | IIANDQGNRI | TPSWVGFTDS | ERLIGEAAKN | [ 50] |
| Athsp70-12  | GIDLGTTYSC | VGVIYHNKHVE | IIANDQGNRI | TPSWVAFTDT | ERLIGEAAKN | [ 50] |
| Athsp70-13  | GIDLGTTYSC | VGWQHDRVE   | IIANDQGNRT | TPSYVAFTDS | ERLIGDAAKN | [ 50] |
| Crhsp70-4   | GIDLGTTYSC | VGVIKNGRVE  | IIANDQGNRI | TPSYVAFTDE | ERLIGDAAKN | [ 50] |
| Crhsp70-5   | GIDLGTTYSC | VGVIKNGRVE  | IIANDQGNRI | TPSYVAFTDE | ERLIGDAAKN | [ 50] |
| Olhsp70-3   | GIDLGTTYSC | VGAYVNGKVE  | IIANDQGNRI | TPSYVAFTDS | ERLIGDSAKN | [ 50] |
| Othsp70-1   | GIDLGTTYSC | VGAYVNGKVE  | IIANDQGNRI | TPSYVAFTDT | ERLIGDSAKN | [ 50] |
| ScSCKAR2    | GIDLGTTYSC | VAVMKNGKTE  | ILANEQGNRI | TPSYVAFTDD | ERLIGDAAKN | [ 50] |
| Orshsp70-15 | GIDLGTTYSC | VGVIYRNGHVE | IIANDQGNRI | TPSWVAFTDG | ERLIGEAAKN | [ 50] |
| Orshsp70-15 | GIDLGTTYSC | VGVIYRNDRVE | IIANDQGNRI | TPSWVAFTDG | ERLIGEAAKN | [ 50] |
| Orshsp70-14 | GIDLGTTYSC | VGVIYRNGHVE | IIANDQGNRI | TPSWVAFTGG | ERLIGEAAKN | [ 50] |
| Orshsp70-13 | GIDLGTTYSC | VGVIYRNGHVD | IVANDQGNRI | TPSWVAFTDD | ERLVGEAAKN | [ 50] |
| Orshsp70-12 | GIDLGTTYSC | VGVIKNGHVE  | IIANDQGNRI | TPSWVAFTDS | ERLIGEAAKN | [ 50] |
| Cmhsp70-4   | GIDLGTTYSC | VGVFKNGKVE  | IIANEQGNRI | TPSYVAFTDK | ERLIGDAAKN | [ 50] |
| Orhsp70-9   | GIDLGTTYSC | VGWQHDRVE   | IIANDQGNRT | TPSYVAFTDS | ERLIGDAAKN | [ 50] |
| Tphsp70-5   | GIDLGTTYSC | VGVFKNGRVE  | IMANDQGNRI | TPSYVAFMDN | ERLVGDAAKN | [ 50] |
| Olhsp70-5   | GIDLGTTYSC | VSVWRNGEAH  | VLTNAEGDRT | TPSWVAFTEQ | GRLVGDAAKR | [ 50] |
| Pfhsp70-3   | GIDLGTTNSC | VAIMEGKQGK  | VIENSEGFRT | TPSVVAFTND | QRLVGIVAKR | [ 50] |
| Pyhsp70-1   | GIDLGTTYSC | VGVFKNGRVE  | ILNNDLGNRI | TPSYVSFVDG | ERKVGEAAKL | [ 50] |
| ScSSB1      | GIDLGTTYSC | VATYESS-VE  | IIANEQGNRV | TPSFVAFTPE | ERLIGDAAKN | [ 50] |
| ScSSB2      | GIDLGTTYSC | VATYESS-VE  | IIANEQGNRV | TPSFVAFTPQ | ERLIGDAAKN | [ 50] |
| Tphsp70-3   | GIDLGTTFSC | VACWDDKTNK  | VEVISPSGRT | CPSWVSFTKE | GKLVGTAAKS | [ 50] |
| Othsp70-2   | GIDLGTTYSC | VSVWRNGEAH  | VLTNAEGDRT | TPSWVAFTEQ | GRLIGDTAKR | [ 50] |
| Othsp70-4   | GIDLGTTYSC | VGWQHDRVE   | IIANDMGNRT | TPSYVAFTDS | ERLIGDSAKN | [ 50] |

|             |            |            |            |             |            |        |
|-------------|------------|------------|------------|-------------|------------|--------|
| EcoliDnaK   | GIDLGTTNSC | VAIMDGTTPR | VLENAEGDRT | TPSIIAYTQD  | ETLVGQPAKR | [ 50]  |
| Orshsp70-9  | GIDLGTTNSC | VSVMEGKNPK | VIENSEGTRT | TPSVVAFNQK  | ERLVGTPAKR | [ 50]  |
| Orshsp70-11 | GIDLGTTNSC | VSVMEGKTPR | VIENAEGART | TPSIVAKNQN  | DLLVGITASR | [ 50]  |
| Orshsp70-10 | GIDLGTTNSC | VSVMEGKNPK | VIENSEGTRT | TPSVVAFNQK  | ELLVGTAKR  | [ 50]  |
| Athsp70-10  | GIDLGTTYSC | VGVIKNGHVE | IIANDQGNRI | TPSWVGFTDS  | ERLIGEAANK | [ 50]  |
| Athsp70-9   | GIDLGTTNSC | VAVMEGKNPK | VIENAEGART | TPSVVAFNTK  | ELLVGTAKR  | [ 50]  |
| Orshsp70-4  | GIDLGTTYSC | VGVMQHDRVE | IIANDQGNRT | TPSYVAFTDS  | ERLIGDAAKN | [ 50]  |
| Crhsp70-2   | -----      | ---MEGKSPR | VIENAEGART | TPSVIAFTDK  | ERLVGLPAKR | [ 50]  |
| Olhsp70-2   | -----      | ---MEGKNAR | VIENAEGART | TPSMVAFTDK  | ERLVGQPAKR | [ 50]  |
| Othsp70-3   | GIDLGTTNSC | VAVMEGKNAR | VIENAEGART | TPSMVAFTDK  | ERLVGQPAKR | [ 50]  |
| Tphsp70-2   | GIDLGTTNSC | VAIMEGRNAR | VIENSEGART | TPSVVAITDD  | TRLVGMMAKR | [ 50]  |
| Cmhs702     | GIDLGTTNSC | VAIMEGKAPR | VIENAEGQRT | TPSVVAFTSS  | ERLVGIAAKR | [ 50]  |
| ScECM10     | GIDLGTTNSA | VAIMEGKVPR | IIENAEGSRT | TPSVVAFTKD  | ERLVGEPAKR | [ 50]  |
| ScSSC1      | GIDLGTTNSA | VAIMEGKVPK | IIENAEGSRT | TPSVVAFTKE  | ERLVGIPAKR | [ 50]  |
| Orshsp70-8  | GIDLGTTNSA | VAAMEGGKPT | IVTNAEGART | TPSVVAYTKS  | DRLVGQIAKR | [ 50]  |
| Orshsp70-7  | GIDLGTTNSA | VAAMEGGKPT | VITNAEGQRT | TPSVVAYTKG  | ERLVGQIAKR | [ 50]  |
| Athsp70-6   | GIDLGTTNSA | VAAMEGGKPT | IVTNAEGQRT | TPSVVAYTKS  | DRLVGQIAKR | [ 50]  |
| Athsp70-7   | GIDLGTTNSA | VAAMEGGKPT | IVTNAEGQRT | TPSVVAYTKS  | DRLVGQIAKR | [ 50]  |
| Cchsp70-1   | GIDLGTTNSV | IAVMEMGKPA | VIPNSEGFRT | TPSVVAYAKN  | DLLVGQIAKR | [ 50]  |
| Cmhs70-1    | GIDLGTTNSV | IAVMEGGQPT | VVPNSEGFRT | TPSVVAYTKN  | DLLVGQIAKR | [ 50]  |
| Athsp70-8   | GIDLGTTNSC | VSVMEGKTAR | VIENAEGSRT | TPSVVAMNQK  | ELLVGTAKR  | [ 50]  |
| Crhsp70-1   | GIDLGTTNSA | VAAMEGGKPT | IITNAEGGRT | TPSVVAFTKT  | DRLVGQIAKR | [ 50]  |
| Gthsp70-1   | GIDLGTTNSV | IAVMEGGKPT | VIPNKEGLRT | TPSVVAYTKK  | DKLVGQIAKR | [ 50]  |
| Guthsp70-1  | GIDLGTTNSV | VAVMEGGKPA | VIQNAEGFRT | TPSVVAYTKT  | DRLVGQIAKR | [ 50]  |
| Olhsp70-1   | GIDLGTTNSA | VAAMEGGSPT | IVTNAEGGRT | TPSVVAYTKT  | DRLVGQIAKR | [ 50]  |
| Oshsp70-1   | GIDLGTTNSV | VAAIEGGQPS | VIVNAEGLRT | TPSIVAYTKK  | ELLVGQIAKR | [ 50]  |
| Pfhs70-1    | GIDLGTTYSC | VGVWRNENVD | IIANDQGNRT | TPSYVAFTDT  | ERLIGDAAKN | [ 50]  |
| Phhs70-1    | GIDLGTTNSV | IAVMEGGKPT | VIPNAEGFRT | TASVVAYTKS  | DKLVGQIARR | [ 50]  |
| Pophsp70-1  | GIDLGTTNSV | IAVMEGGKPT | VIPNAEGFRT | TASVVAYTKS  | DKLVGQIARR | [ 50]  |
| Poyhsp70-1  | GIDLGTTNSV | IAVMEGGKPT | VIPNAEGFRT | TASVVAYTKS  | DKLVGQIARR | [ 50]  |
| Pyhs702     | GIDLGTTYSC | VGVWRNENVD | IIANDQGNRT | TPSYVAFTDT  | ERLIGDAAKN | [ 50]  |
| SynDnaK1    | GIDLGTTNSC | ASVLEGGKPI | VITNTEGGRT | TPSIVGFTKG  | QRLVGQLAKR | [ 50]  |
| SynDnaK2    | GIDLGTTNSC | VAVMEGGKPT | VIANAEGFRT | TPSVVGYAKN  | DRLVGQIAKR | [ 50]  |
| SynDnaK3    | GIDLGTTNSV | VAVMEGGKPI | VIANAEGMRT | TPSVVGFNKE  | ELVVGQMGRR | [ 50]  |
| Tphsp70-1   | GIDLGTTNSV | VAAIEGGQPT | VITNAEGFRT | TPSIVAYTKK  | ELLVGQLAKR | [ 50]  |
|             |            |            |            |             |            |        |
| Athsp70-1   | QVAMNPVNTV | FDAKRLIGRR | FSDSSVQSDM | KLWPFKIQAG  | -PADKPMIYV | [ 100] |
| Athsp70-2   | QVAMNPVNTV | FDAKRLIGRR | FSDASVQSDR | QLWPFTHIISG | -TAEKPMIVV | [ 100] |
| Athsp70-3   | QVAMNPINTV | FDAKRLIGRR | FTDSSVQSDI | KLWPFTHLKS  | -PAEKPMIVV | [ 100] |
| Athsp70-4   | QVAMNPNTV  | FDAKRLIGRR | YSDPSVQADK | SHWPFKVVSG  | -PGEKPMIVV | [ 100] |
| Athsp70-5   | QVALNPQNTV | FDAKRLIGRK | FSDPSVQSDI | LHWPFKVVSG  | -PGEKPMIVV | [ 100] |
| Orshsp70-5  | QVAMNPINTV | FDAKRLIGRR | FSDASVQSDI | KLWPFKVIAG  | -PGDKPMIVV | [ 100] |
| Orshsp70-3  | QVAMNPNTV  | FDAKRLIGRR | FSDPSVQSDM | KLWPFKVVPG  | -PGDKPMIVV | [ 100] |
| Orshsp70-6  | QVAMNPINTV | FDAKRLIGRR | FSDASVQSDI | KMWPYKVIPG  | -PGDKPMIVV | [ 100] |
| Orshsp70-1  | QVAMNPNTV  | FDAKRLIGRR | FSDPSVQADM | KMWPYKVVPG  | -PADKPMIVV | [ 100] |
| Crhsp70-3   | QVAMNPRHTV | FDAKRLIGRK | FSDPIVQADI | KLWPFQVRAG  | -AHDVPEIVV | [ 100] |
| Olhsp70-4   | QTAMNPMNTV | FDAKRLIGRK | FSEPQVQADI | KDWSFKVEAG  | -EADKPMIVV | [ 100] |
| Othsp70-5   | QAVVNPQNTF | ASVKRFIGRK | MDE--VKSES | KEIPYSVUNA  | -SGNVKIDCP | [ 100] |

|             |             |            |             |             |             |       |
|-------------|-------------|------------|-------------|-------------|-------------|-------|
| Tphsp70-4   | QAAMNASNTV  | FDAKRLIGRK | FSDPGVQSDM  | KHWPFKVIPG  | -TGGTPIIEV  | [100] |
| Pfhsp70-2   | EATLHPTQTV  | FDVKRLIGRK | FDDQEVVKDR  | SLLPYEIVNN  | -QG-KPNIKV  | [100] |
| ScSSA1      | QAAMNPSNTV  | FDAKRLIGRN | FNDPEVQADM  | KHFPPKLIIDV | -DG-KPQIQV  | [100] |
| ScSSA2      | QAAMNPANTV  | FDAKRLIGRN | FNDPEVQADM  | KHFPPKLIIDV | -DG-KPQIQV  | [100] |
| ScSSA3      | QAAINPHNTV  | FDAKRLIGRK | FDDPEVTTDA  | KHFPPKVISR  | -DG-KPVVQV  | [100] |
| ScSSA4      | QAAMNPHTV   | FDAKRLIGRK | FDDPEVTNDA  | KHYPPKVIDK  | -GG-KPVVQV  | [100] |
| Cmhsp70-3   | QVALNPENTV  | FDAKRLIGRK | FSDPTVQEDM  | KHWPFKVVQG  | -PGDKPLIQV  | [100] |
| Pyhsp70-3   | QAITNPENTV  | YATKRFIGRK | FDEDATKKEQ  | KNLPYKIVRA  | PNGD-AWIEA  | [100] |
| Athsp70-11  | QAAVNPERTV  | FDVKRLIGRK | FEDKEVQKDR  | KLVPYQIVNK  | -DG-KPYIQV  | [100] |
| Athsp70-12  | QAAKNPERTI  | FDPKRLIGRK | FDDPDVQRDI  | KFLPYKVVNK  | -DG-KPYIQV  | [100] |
| Athsp70-13  | QVAMNPVNTV  | FDAKRLIGRR | FSDASVQSDM  | KFWPFKVTGP  | -QADKPMIFV  | [100] |
| Crhsp70-4   | QATVNPKRTI  | YDVKRLIGRK | FSDADVQRDR  | KLVSYDIVDR  | -QG-KPYVAV  | [100] |
| Crhsp70-5   | QATVNPKRTV  | YDVKRLIGRK | YEDKEVQRDK  | KLVSYDIVDR  | -QG-KPYVAV  | [100] |
| Olhsp70-3   | QASANPRTV   | FDAKRLIGRK | FTDKEVQRDL  | KMFPFKVVDK  | -DS-KPCIEV  | [100] |
| Othsp70-1   | QASANPRTV   | FDAKRLIGRK | FTDKEVQRDL  | KMFPFKIVDK  | -DS-KPCIEI  | [100] |
| ScKAR2      | QVAANPQNTI  | FDIKRLIGLK | YNDRSVQKDI  | KHLPFNVVNK  | -DG-KPAVEV  | [100] |
| Orshsp70-15 | QAAANPERTI  | YDAKRLIGRQ | FSDAEVQRDM  | KLLPFAVVDR  | -NG-KPHVRV  | [100] |
| Orshsp70-16 | QAAANPERTI  | YDAKRLIGRQ | FSDAEVQRDM  | KLLPFAVVDR  | -NG-KPHVRV  | [100] |
| Orshsp70-14 | QAAANPGRTV  | YDAKRLIGRR | FADAEVQRDM  | RLLPFAVVDR  | -GG-KPHVRV  | [100] |
| Orshsp70-13 | QAAALNPDRTI | FDIKRLIGRR | FDDEEVQRDV  | KYLPYKVVDK  | -GG-KPYVEV  | [100] |
| Orshsp70-12 | QAAVNPERTI  | FDVKRLIGRK | FEDKEVQRDM  | KLVPYKIVNK  | -DG-KPYIQV  | [100] |
| Cmhsp70-4   | QLALNPERTI  | FDVKRLIGRR | FDEETVQKDI  | KLLPYKVVNK  | -DG-KPYIRV  | [100] |
| Orshsp70-2  | QVAMNPINTV  | FDAKRLIGRR | FSDTSVQSDA  | KLWPFKVLPG  | -PGDKPMIGV  | [100] |
| Tphsp70-5   | QATINPENTV  | FDVKRLIGRN | FSDKSVQADK  | KLVPYKIVSN  | -EN-KPMVEV  | [100] |
| Olhsp70-5   | QAAINPKNTL  | FNIKRIIGRQ | YSE--CAHEL  | ELMPFDVKEG  | -EGGKPIVSV  | [100] |
| Pfhsp70-3   | QAITNPENTV  | YATKRFIGRK | YDEDATKKEQ  | KNLPYKIVRA  | SNGD-AWIEA  | [100] |
| Pyhsp70-1   | EATLHPTQTV  | FDVKRLIGRK | FDDKEVAKDR  | TLLPYEIVNN  | -EG-KPNIKV  | [100] |
| ScSSB1      | QAAALNPRNTV | FDAKRLIGRR | FDDESVQKDM  | KTWPFKVIDV  | -DG-NPVIEV  | [100] |
| ScSSB2      | QAAALNPRNTV | FDAKRLIGRR | FDDESVQKDM  | KTWPFKVIDV  | -DG-NPVIEV  | [100] |
| Tphsp70-3   | QVASNPRNTV  | YDIKRIIGRS | FTDPVTAEEC  | KNFPFEVSEG  | GAHGEPKIVV  | [100] |
| Othsp70-2   | QAAVNPKNLTL | FNIKRIIGRQ | YSE--CADDI  | ALMPFDVKEG  | -EGGKPVISV  | [100] |
| Othsp70-4   | QTAMNPNTV   | FDAKRLIGRK | FSEPQVQADI  | KDWSFKVEAG  | -EHDKPMIAV  | [100] |
| EcoliDnaK   | QAVTNPQNTL  | FAIKRLIGRR | FQDEEVQRDV  | SIMPFKIIAA  | DNGD-AWVEV  | [100] |
| Orshsp70-9  | QAVTNPQNTF  | FGTKRLIGRR | FEDPQTQKEM  | KMVPYKIVKA  | PNGD-AWVET  | [100] |
| Orshsp70-11 | QAVTNAQNTV  | RGSKRLIGRT | FDDPQTQKEM  | KMVPYKIVRG  | PNGD-AWVEM  | [100] |
| Orshsp70-10 | QAVTNPQNTF  | FGTKRLIGRR | FDDPQTQKEM  | KMVPYKIVKA  | LNGD-AWLET  | [100] |
| Athsp70-10  | QAAVNPERTV  | FDVKRLIGRK | FEDKEVQKDR  | KLVPYQIVNK  | -DG-KPYIQV  | [100] |
| Athsp70-9   | QAVTNPTNTV  | SGTKRLIGRK | FDDPQTQKEM  | KMVPYKIVRA  | PNGD-AWVEA  | [100] |
| Orshsp70-4  | QVAMNPINTV  | FDAKRLIGRR | FSDPSVQSDM  | KLWPFKVIPG  | -PGDKPMIVV  | [100] |
| Crhsp70-2   | QAVTNPTNTV  | YATKRLIGRG | YDDPQTQKEA  | KMVPYKIVKA  | KNGD-AWVEA  | [100] |
| Olhsp70-2   | QAVTNPTNTL  | YATKRLIGRT | FEDDEHTQKEA | KLVPYEIVKA  | SNGD-AWVAA  | [100] |
| Othsp70-3   | QAVTNPTNTL  | YATKRLIGRT | FEDDEHTQKEA | KLVPYEIICA  | PNGD-AWVSA  | [100] |
| Tphsp70-2   | QAVTNPENTF  | YAVKRLIGRS | FSDKEVKDIO  | GLVPYNIVKS  | DNNDDAWVEA  | [100] |
| Cmhsp70-2   | QAVTNPENTI  | FAAKRLIGRR | YEDPEVQRDV  | KIMPYKIVRA  | DNGD-AWVEA  | [100] |
| ScECM10     | QSVINSENTL  | FATKRLIGRR | FEDAEOQRDI  | NQVPFKIVKH  | SNGD-AWVEA  | [100] |
| ScSSC1      | QAVVNPENTL  | FATKRLIGRR | FEDAEOQRDI  | KQVPYKIVKH  | SNGD-AWVEA  | [100] |
| Orshsp70-8  | QAVVNPENTF  | FSVKRFIGRK | MNE--VDEES  | KQVSYRVIRD  | DNGNVKLDCEP | [100] |
| Orshsp70-7  | QAVVNPENTF  | FSVKRFIGRK | MAE--VDDEA  | KQVSYHVVRD  | DNGNVKLDCEP | [100] |

|            |             |            |             |             |            |         |
|------------|-------------|------------|-------------|-------------|------------|---------|
| Athsp70-6  | QAVVNPENTF  | FSVKRFIGRK | MNE--VDEES  | KQVSYRVVVRD | ENNNVKLECP | [ 100 ] |
| Athsp70-7  | QAVVNPENTF  | FSVKRFIGRR | MNE--VAEES  | KQVSYRVIKD  | ENGNVKLDCP | [ 100 ] |
| Cchsp70-1  | QAVINPSNTF  | YSVKRFIGRK | FEE--INEEN  | RQVTYQVNKD  | PSGNVKIYCP | [ 100 ] |
| Cmhs70-1   | QAVINPGNTF  | YSVKRFIGRK | FSE--IEQEA  | KQVPYPVQAD  | GKGNVRIFC  | [ 100 ] |
| Athsp70-8  | QAVTNPTNTI  | FGSKRLIGRR | FDDPQTQKEM  | KMVPYKIVKA  | PNGD-AWVEA | [ 100 ] |
| Crhs70-1   | QAVVNPENTF  | FSVKRFIGRR | MSE--VGSES  | TQVPYRVIED  | -GGNVKIKCP | [ 100 ] |
| Gthsp70-1  | QAVMNPENTF  | YSVKRFIGRK | KDE--LGDEL  | KQSSYNVKT   | INSNVKLECP | [ 100 ] |
| Guthsp70-1 | QAVINPDNTF  | YSVKRFIGRR | SEE--VSEEL  | KQVSYIVKTD  | SNGNIKLDCP | [ 100 ] |
| Olhsp70-1  | QGVVNPENTF  | FSVKRFIGRK | MDE--VNSES  | KEIPYSVVNS  | -AGKVKIECP | [ 100 ] |
| Oshsp70-1  | QAVINPENTF  | FSVKRFIGSK | ELE--ISADS  | KKLPYKVVKD  | QNGNIKINCS | [ 100 ] |
| Pfhsp70-1  | QVARNPENTV  | FDKRLIGRK  | FTESSVQSDM  | KHWPFTVKSG  | -VDEKPMIEV | [ 100 ] |
| Phhsp70-1  | QAVINPENTF  | YSVKRFIGRK | QNE--ISQEI  | RQTSYNVKTS  | GSS-IKIACP | [ 100 ] |
| Pophsp70-1 | QAVINPENTF  | YSVKRFIGRK | QNE--ISQEI  | RQTSYNVKTS  | GSS-IKIECP | [ 100 ] |
| Poyhsp70-1 | QAVINPENTF  | YSVKRFIGRK | QNE--ISQEI  | RQTSYNVKTS  | GSS-IKIACP | [ 100 ] |
| Pyhsp70-2  | QVARNPENTV  | FDKRLIGRK  | FTESSVQSDM  | KHWPFTVKSG  | -IEEKPMIEV | [ 100 ] |
| SyDnaK1    | QSVTNAENTV  | YSIKRFIGRR | WDD--TVEER  | SRVPYNCVKG  | RDDTVSVSIR | [ 100 ] |
| SynDnaK2   | QAVMNPENTF  | YSVKRFIGRK | FDE--ITNEA  | TEVAYSVVKD  | GNGNVKLD   | [ 100 ] |
| SynDnaK3   | QAVLNQNTF   | YGVKRFMGR  | YTD--LTPES  | KRVAYTIRRD  | DRDNIKVRCP | [ 100 ] |
| Tphsp70-1  | QSVVNAENTF  | FSVKRFIGCK | ADE--ISEES  | KELPYKVIKD  | SNGNIKIKCS | [ 100 ] |
|            |             |            |             |             |            |         |
| Athsp70-1  | EYKKEFAAEE  | ISSMVLKMR  | EIAEAYLGVT  | IKNAVVTVPA  | YFNDSQRQAT | [ 150 ] |
| Athsp70-2  | EYKKQFAAEE  | ISSMVLKMR  | EIAEAF LGTT | VKNAVVTVPA  | YFNDSQRQAT | [ 150 ] |
| Athsp70-3  | NYKKEFSAEE  | ISSMILKMR  | EIAEAYLGTT  | IKNAVVTVPA  | YFNDSQRQAT | [ 150 ] |
| Athsp70-4  | NHKKQFSAEE  | ISSMVLKMR  | EIAEAF LGSP | VKNAVVTVPA  | YFNDSQRQAT | [ 150 ] |
| Athsp70-5  | SYKKQFSPEE  | ISSMVLKMK  | EVAEAF LGRT | VKNAVVTVPA  | YFNDSQRQAT | [ 150 ] |
| Orshsp70-5 | QYKKQFAAEE  | ISSMVLKMR  | EIAEAYLGTT  | IKNAVVTVPA  | YFNDSQRQAT | [ 150 ] |
| Orshsp70-3 | QYKKQFAAEE  | ISSMVLKMR  | EIAEAYLGSS  | IKNAVVTVPA  | YFNDSQRQAT | [ 150 ] |
| Orshsp70-6 | QYKKQFSAEE  | ISSMVLKMR  | EIAEAYLGST  | VKNAVVTVPA  | YFNDSQRQAT | [ 150 ] |
| Orshsp70-1 | TYKKKFSAAE  | ISSMVLTKMK | EIAEAF LSTT | IKNAVITVPA  | YFNDSQRQAT | [ 150 ] |
| Crhs70-3   | SYKKVFKAAE  | ISSMVLKMK  | ETAQAF LGAD | VKKAVVTVPA  | YFNDSQRQAT | [ 150 ] |
| Olhsp70-4  | EFHKKFSAAE  | ISSMVLKMK  | EVAEAYLGKD  | IKNAVVTVPA  | YFNDSQRQAT | [ 150 ] |
| Othsp70-5  | ALGKQFAAEE  | ISAQVLRKLC | DDAATFLGDT  | VTKAVVTVPA  | YFNDSQRQAT | [ 150 ] |
| Tphsp70-4  | EYKKQFKAEE  | ISSMVLTKMK | EIAEAYLGKE  | VKNAVVTVPA  | YFNDSQRQAT | [ 150 ] |
| Pfhsp70-2  | QIKTTFAPEQ  | ISAMVLEKMK | EIAQSFLGKP  | VKNAVVTVPA  | YFNDAQRQAT | [ 150 ] |
| SCSCSSA1   | EFKKNFTPEQ  | ISSMVLGKMK | ETAESYLGAK  | VNDAVVTVPA  | YFNDSQRQAT | [ 150 ] |
| SCSCSSA2   | EFKKNFTPEQ  | ISSMVLGKMK | ETAESYLGAK  | VNDAVVTVPA  | YFNDSQRQAT | [ 150 ] |
| SCSCSSA3   | EYKKTFTPEE  | ISSMVLKMK  | ETAENYLGTT  | VNDAVVTVPA  | YFNDSQRQAT | [ 150 ] |
| SCSCSSA4   | EYKKTFTPEE  | ISSMILTKMK | ETAENFLGTE  | VKDAVVTVPA  | YFNDSQRQAT | [ 150 ] |
| Cmhs70-3   | VAHKRFSPPEE | ISAMVLTKMK | DIAESYLGTK  | VTDAVITVPA  | YFNDSQRQAT | [ 150 ] |
| Pyhsp70-3  | Q-GKKYSPSQ  | IGACVLEKMK | ETAENYLGK   | VHQA VITVPA | YFNDSQRQAT | [ 150 ] |
| Athsp70-11 | KIKKVFSPEE  | ISAMILTKMK | ETA EAYLGK  | IKDAVVTVPA  | YFNDAQRQAT | [ 150 ] |
| Athsp70-12 | KVKKLFSPPEE | ISAMILTKMK | ETA EAF LGK | IKDAVITVPA  | YFNDAQRQAT | [ 150 ] |
| Athsp70-13 | NYKKQFAAEE  | ISSMVLKMR  | EIAEAYLGSS  | IKNAVVTVPA  | YFNDSQRQAT | [ 150 ] |
| Crhs70-4   | DVKKVFSPEE  | ISAMILQKMK | DTAEAYLGKT  | VKHAVVTVPA  | YFNDAQRQAT | [ 150 ] |
| Crhs70-5   | DVKKVFSPEE  | ISAMILQKMK | DTAEAYLGKT  | VKHAVVTVPA  | YFNDAQRQAT | [ 150 ] |
| Olhsp70-3  | ELKKVFQAAE  | ISAMVLTKMK | ETA EAYLGKD | IKHAVVTVPA  | YFNDAQRQAT | [ 150 ] |
| Othsp70-1  | ELKKIFQAAE  | ISAMVLTKMK | ETA EAYLGKD | IKNAVVTVPA  | YFNDAQRQAT | [ 150 ] |
| SCKAR2     | SVKKVFTPEE  | ISGMILGKMK | QIAEDYLGTK  | VTHAVVTVPA  | YFNDAQRQAT | [ 150 ] |

|             |             |            |            |            |            |         |
|-------------|-------------|------------|------------|------------|------------|---------|
| Orshsp70-15 | EVKRVFSPEE  | VSAMVLTRMK | ETAAYLGEK  | VTRAVVTVPA | YFNDAQRQAT | [ 150 ] |
| Orshsp70-16 | EVKRVFSPEE  | VSAMVLTRMK | ETAAYLGEK  | VTRAVVTVPA | YFNDAQRQAT | [ 150 ] |
| Orshsp70-14 | EVRRLLSPEE  | VSAMVLARMK | ETAAYLGEE  | VTRAVVTVPA | YFNDAQRQAT | [ 150 ] |
| Orshsp70-13 | RVKKVFSPEE  | ISAMILAKMK | ETAESYLQOR | VTDAVVTVPA | YFNDAQRQAT | [ 150 ] |
| Orshsp70-12 | KIKKVFSPEE  | VSAMILGKMK | ETAAYLGKK  | INDAVVTVPA | YFNDAQRQAT | [ 150 ] |
| Cmhsp70-4   | EVRKTFSPPEE | ISAMILGKMK | KIAEDYLGKP | VKNAVVTVPA | YFNDAQRQAT | [ 150 ] |
| Orshsp70-2  | QYKKQFSAEE  | ISSMVLNKMK | ETAAYLGST  | VKNAVVTVPA | YFNDSQRQAT | [ 150 ] |
| Tphsp70-5   | DIEQRFAPPEE | VSAMILQKMK | STAETFLGKE | IKNAVVTVPA | YFNDAQRQAT | [ 150 ] |
| Olhsp70-5   | DVNKDFAPEQ  | ISAMVLQKMK | ATAEAQLGVP | ITKAVVTVPA | YFNDAQRRQT | [ 150 ] |
| Pfhsp70-3   | Q-GKKYSPSQ  | IGACVLEKMK | ETAENYLGRK | VHQAVITVPA | YFNDSQRQAT | [ 150 ] |
| Pyhsp70-1   | QIKTTFAPEQ  | ISAMVLEKMK | EIAQSFLGKP | VKNAVVTVPA | YFNDAQRQAT | [ 150 ] |
| SCSCSSB1    | QYLKTFSPQE  | ISAMVLTKMK | EIAEAKIGKK | VEKAVITVPA | YFNDAQRQAT | [ 150 ] |
| SCSCSSB2    | QYLKTFSPQE  | ISAMVLTKMK | EIAEAKIGKK | VEKAVITVPA | YFNDAQRQAT | [ 150 ] |
| Tphsp70-3   | EWKELRPEE   | ISAMVLAELK | LAAERHLGRE | VKGAVITVPA | HFNNQQRQAT | [ 150 ] |
| Othsp70-2   | EVGKEFAPEQ  | ISAMVLQKMK | ATAEAQLGVP | ITKAVVTVPA | YFNDAQRRQT | [ 150 ] |
| Othsp70-4   | DFHKKFSAEE  | ISSMVLVKMK | ETAAYLGKE  | IKNAVVTVPA | YFNDSQRQAT | [ 150 ] |
| EcolidNaK   | K-GQKMAPPQ  | ISAEVLKMK  | KTAEDYLGEP | VTEAVITVPA | YFNDAQRQAT | [ 150 ] |
| Orshsp70-9  | TDGKQYSPSQ  | IGAFVLTKMK | ETAESYLGKT | VSKAVITVPA | YFNDAQRQAT | [ 150 ] |
| Orshsp70-11 | G-GQYSPSQ   | IGAFVLTKMK | ETAEAFLGKT | VSKAVITVPA | YFNDAQRQAT | [ 150 ] |
| Orshsp70-10 | TDGKQYSPSQ  | IGAFVLTKMK | ETAESYLGKS | VSKAVITVPA | YFNDAQRQAT | [ 150 ] |
| Athsp70-10  | KIKKVFSPEE  | ISAMILTKMK | ETAAYLGKK  | IKDAVVTVPA | YFNDAQRQAT | [ 150 ] |
| Athsp70-9   | N-GQYSPSQ   | IGAFILTKMK | ETAAYLGKS  | VTKAVVTVPA | YFNDAQRQAT | [ 150 ] |
| Orshsp70-4  | QYKKQFSAEE  | ISSMVLKMR  | EIAEAYLGSN | IKNAVVTVPA | YFNDSQRQAT | [ 150 ] |
| Crhsp70-2   | A-GQYSPSQ   | MGAFVLTKMK | ETAAYLGHP  | VSKAVITVPA | YFNDSQRQAT | [ 150 ] |
| Olhsp70-2   | G-GKQYSPSQ  | VGAFVLQKMK | ETAAYLGHG  | VSQAVVTVPA | YFNDAQRQAT | [ 150 ] |
| Othsp70-3   | G-GKQYSPSQ  | VGAFVLQKMK | ETAAYLGSN  | VSQAVITVPA | YFNDAQRQAT | [ 150 ] |
| Tphsp70-2   | R-GKKFSPSQ  | IGSMVLGKMK | ETAEGFLGRD | VTKAVVTVPA | YFNDSQRQAT | [ 150 ] |
| Cmhsp70-2   | Q-GNRYSPAQ  | IGAFVLQKMK | ETAESFLGRT | VNNAVITVPA | YFNDAQRQAT | [ 150 ] |
| SCECM10     | R-NRTYSPAQ  | IGGFILNKMK | ETAAYLAKS  | VKNAVVTVPA | YFNDAQRQAT | [ 150 ] |
| SSC1        | R-GQYSPAQ   | IGGFVLNKMK | ETAAYLGKP  | VKNAVVTVPA | YFNDSQRQAT | [ 150 ] |
| Orshsp70-8  | AIGKQFAAEE  | ISAQVLRKLV | DDASKFLNDK | VTKAVITVPA | YFNDSQRTAT | [ 150 ] |
| Orshsp70-7  | AIGKQFAAEE  | ISAQVLRKLV | DDASKFLNDK | ITKAVVTVPA | YFNDSQRTAT | [ 150 ] |
| Athsp70-6   | AINKQFAAEE  | ISAQVLRKLV | DDASRFLNDK | VTKAVITVPA | YFNDSQRTAT | [ 150 ] |
| Athsp70-7   | AIGKQFAAEE  | ISAQVLRKLV | DDASRFLNDK | VTKAVITVPA | YFNDSQRTAT | [ 150 ] |
| Cchsp70-1   | FKNKDFTPEE  | ISAQVIRKLT | EGASKYLGEK | ITKAVITVPA | YFNDSQRQAT | [ 150 ] |
| Cmhsp70-1   | AKDKFFAPEE  | ISAQVLRKLV | DSASOYLGEK | VTQAVITVPA | YFNDSQRQAT | [ 150 ] |
| Athsp70-8   | N-GQKFSPSQ  | IGANVLTKMK | ETAAYLGKS  | INKAVVTVPA | YFNDAQRQAT | [ 150 ] |
| Crhsp70-1   | NAGKDFAPEE  | ISAQVLRKLT | EDAAKFLNDK | VEKAVITVPA | YFNDSQRQAT | [ 150 ] |
| Gthsp70-1   | ALSKDFAPEE  | ISAQVLRKLV | EDASTYLGQQ | VTQAVITVPA | YFNDSQRQAT | [ 150 ] |
| Guthsp70-1  | SLKKEFASEE  | ISAEVLRKLV | DDASKYLGES | VKQAVITVPA | YFNDSQRQAT | [ 150 ] |
| Olhsp70-1   | ALGKQFAAEE  | ISAQVLRKLC | DDAASFLGDA | VTKAVVTVPA | YFNDSQRQAT | [ 150 ] |
| Oshsp70-1   | SLNKEFSPEE  | ISAQVLRKLI | NDATSYLQOD | VTQAVITVPA | YFNDSQRQAT | [ 150 ] |
| Pfhsp70-1   | TYQKLFHPEE  | ISSMVLQKMK | ENAEFLGKS  | IKNAVITVPA | YFNDSQRQAT | [ 150 ] |
| Phhsp70-1   | ALDKDFAPEE  | ISAQVLRKLV | EDASTYLGET | VTQAVITVPA | YFNDSQRQAT | [ 150 ] |
| Pophsp70-1  | ALNKDFAPEE  | ISAQVLRKLV | EDASTYLGET | VTQAVITVPA | YFNDSQRQAT | [ 150 ] |
| Poyhsp70-1  | ALNKDFAPEE  | ISAQVLRKLV | EDASTYLGET | VTQAVITVPA | YFNDSQRQAT | [ 150 ] |
| Pyhsp70-2   | VYQKLFHPEE  | ISSMVLQKMK | ENAEFLGKS  | IKNAVITVPA | YFNDSQRQAT | [ 150 ] |
| SyDnaK1     | G--QSYTPQE  | ISAMILQKMK | ADSEAFLEGP | VTQAVITVPA | YFTDAQRQAT | [ 150 ] |

|             |            |            |            |            |             |         |
|-------------|------------|------------|------------|------------|-------------|---------|
| SynDnaK2    | AQGKQFAPEE | ISAQVLRKLV | DDASKYLGET | VTQAVITVPA | YFNDSQRQAT  | [ 150 ] |
| SynDnaK3    | RLKKDFAPEE | ISAMILRKLA | EEASRYLGEK | VTGAVITVPA | YFNDSQRQAT  | [ 150 ] |
| Tphsp70-1   | SLNKDFSPEE | ISAQVIRKLI | ADAKEYLGQD | VTKAVITVPA | YFNDSQRQAT  | [ 150 ] |
|             |            |            |            |            |             |         |
| Athsp70-1   | KDAGVIAGLN | VMRIINEPTA | AAIAYGLDKK | EKNVLIFDLG | GGTFDVSLLT  | [ 200 ] |
| Athsp70-2   | KDAGVIAGLN | VLRIINEPTA | AAIAYGLDKK | EKNVLIFDLG | GGTFDVSLLT  | [ 200 ] |
| Athsp70-3   | KDAGVIAGLN | VMRIINEPTA | AAIAYGLDKK | EKNVLIFDLG | GGTFDVSLLT  | [ 200 ] |
| Athsp70-4   | KDAGVISGLN | VMRIINEPTA | AAIAYGLDKK | EKNVLIFDLG | GGTFDVSLLT  | [ 200 ] |
| Athsp70-5   | KDAGAISGLN | VLRIINEPTA | AAIAYGLDKK | EKNVLIFDLG | GGTFDVSLLT  | [ 200 ] |
| Orshsp70-5  | KDAGVIAGLN | VMRIINEPTA | AAIAYGLDKK | EKNVLIFDLG | GGTFDVSLLT  | [ 200 ] |
| Orshsp70-3  | KDAGVIAGLN | VMRIINEPTA | AAIAYGLDKK | EKNVLIFDLG | GGTFDVSLLT  | [ 200 ] |
| Orshsp70-6  | KDAGVIAGLN | VMRIINEPTA | AAIAYGLDKK | EKNVLIFDLG | GGTFDVSLLT  | [ 200 ] |
| Orshsp70-1  | KDAGVISGLN | VMRIINEPTA | AAIAYGLDKK | EKNVLIFDLG | GGTFDVSIILT | [ 200 ] |
| Crhsp70-3   | KDAGMIAGLE | VLRIINEPTA | AAIAYGLDKK | ERNVLIFDLG | GGTFDVSLLT  | [ 200 ] |
| Olhsp70-4   | KDAAVISGLN | CLRIINEPTA | AAIAYGLDKR | EKNVLIFDLG | GGTFDVSLLT  | [ 200 ] |
| Othsp70-5   | KDAGQIAGIE | VLRIINEPTA | ASLAYGFDRK | NETILIFDLG | GGTFDVSILE  | [ 200 ] |
| Tphsp70-4   | KDAGAISGLN | VLRIINEPTA | AAIAYGLDQK | EKNVLIFDLG | GGTFDVSLLT  | [ 200 ] |
| Pfhsp70-2   | KDAGTIAGLN | IVRIINEPTA | AALAYGLDKK | -TSILVYDLG | GGTFDVSILV  | [ 200 ] |
| SCSSA1      | KDAGTIAGLN | VLRIINEPTA | AAIAYGLDKK | EH-VLIFDLG | GGTFDVSLLS  | [ 200 ] |
| SCSSA2      | KDAGTIAGLN | VLRIINEPTA | AAIAYGLDKK | EH-VLIFDLG | GGTFDVSLLS  | [ 200 ] |
| SCSSA3      | KDAGTIAGMN | VLRIINEPTA | AAIAYGLDKK | EHNVLIFDLG | GGTFDVSLLS  | [ 200 ] |
| SCSSA4      | KDAGTIAGLN | VLRIINEPTA | AAIAYGLDKK | EHNVLIFDLG | GGTFDVSLLS  | [ 200 ] |
| Cmhsp70-3   | KDAGTIAGLN | VLRIINEPTA | AAIAYGIDKK | ERNVLIYDLG | GGTFDVSLLS  | [ 200 ] |
| Pyhsp70-3   | KDAGKIAGLD | VLRIINEPTA | AALAFGLEKS | GKVIAYVDLG | GGTFDVSILE  | [ 200 ] |
| Athsp70-11  | KDAGVIAGLN | VARIINEPTA | AAIAYGLDKK | EKNILVFDLG | GGTFDVSILT  | [ 200 ] |
| Athsp70-12  | KDAGAIAGLN | VVRIINEPTG | AAIAYGLDKK | ESNILVYDLG | GGTFDVSILT  | [ 200 ] |
| Athsp70-13  | KDAGVIAGLN | VLRIINEPTA | AAIAYGLDKK | IKNVLIFDLG | GGTFDVSLLT  | [ 200 ] |
| Crhsp70-4   | KDAGTISGLN | VVRIINEPTA | AAIAYGLDKK | EKNILVFDLG | GGTFDVSILT  | [ 200 ] |
| Crhsp70-5   | KDAGTISGLN | VVRIINEPTA | AAIAYGLDKK | EKNILVFDLG | GGTFDVSILT  | [ 200 ] |
| Olhsp70-3   | KDAGVIAGLN | VARIINEPTA | AAIAYGLDKK | EKNILVFDLG | GGTFDVSILT  | [ 200 ] |
| Othsp70-1   | KDAGIIAGLN | VARIINEPTA | AAIAYGLDKK | EKNILVFDLG | GGTFDVSILT  | [ 200 ] |
| ScKAR2      | KDAGTIAGLN | VLRIINEPTA | AAIAYGLDKS | EHQIIVYDLG | GGTFDVSLLS  | [ 200 ] |
| Orshsp70-15 | KDAGVIAGLT | VDRIINEPTA | AAIAYGIDKK | EKNVLVFDLG | GGTFDVSILA  | [ 200 ] |
| Orshsp70-16 | KDAGVIAGLT | VDRIINEPTA | AAIAYGIDKK | EKNVLVFDLG | GGTFDVSILA  | [ 200 ] |
| Orshsp70-14 | KDAATIAGLA | VERILNEPTA | AALAYGVGKE | GKNVLVFDLG | GGTFDVSILA  | [ 200 ] |
| Orshsp70-13 | KDAGTIAGLN | VPRIINEPTA | AAIAYGLDRK | MTNVLVYDLG | GGTFDVSILS  | [ 200 ] |
| Orshsp70-12 | KDAGVIAGLN | VARIINEPTA | AAIAYGLDKK | EKNILVFDLG | GGTFDVSILT  | [ 200 ] |
| Cmhsp70-4   | KDAGTIAGLT | VQRIINEPTA | AAIAYGLDKG | EKNILVFDLG | GGTFDVTLLT  | [ 200 ] |
| Orshsp70-2  | KDAGVISGLN | VMRIINEPTA | AAIAYGLDKK | EKNVLIFDLG | GGTFDVSLLT  | [ 200 ] |
| Tphsp70-5   | KDAGTISGMK | VERIINEPTA | AAIAYGMDKT | ESNVLVFDLG | GGTFDVTLLT  | [ 200 ] |
| Olhsp70-5   | KDAGAIAGLD | VLRIINEPTA | AALAYGLDRR | NQCILVFDLG | GGTFDVSLLN  | [ 200 ] |
| Pfhsp70-3   | KDAGKIAGLD | VLRIINEPTA | AALAFGLEKS | GKVIAYVDLG | GGTFDISILE  | [ 200 ] |
| Pyhsp70-1   | KDAGAIAGLN | IVRIINEPTA | AALAYGLDKK | -TSILVYDLG | GGTFDVSILV  | [ 200 ] |
| ScSSB1      | KDAGAISGLN | VLRIINEPTA | AAIAYGLGAG | -RHVLIFDLG | GGTFDVSLLH  | [ 200 ] |
| ScSSB2      | KDAGAISGLN | VLRIINEPTA | AAIAYGLGAG | -RHVLIFDLG | GGTFDVSLLH  | [ 200 ] |
| Tphsp70-3   | KDAGRIAGLD | VKRIINEPTA | AALSYGLHAK | KANVVIFDLG | GGTFDVSILA  | [ 200 ] |
| Othsp70-2   | KDAGAIAGLD | VLRIINEPTA | AALAYGLDRR | SQCILVFDLG | GGTFDVSLLA  | [ 200 ] |
| Othsp70-4   | KDAAVIAGLN | CLRIINEPTA | AAIAYGLDKR | EKNVLIFDLG | GGTFDVSLLT  | [ 200 ] |

|             |            |            |            |            |            |       |
|-------------|------------|------------|------------|------------|------------|-------|
| EcoliDnaK   | KDAGRIAGLE | VKRIINEPTA | AALAYGLDKG | NRTIAVYDLG | GGTFDISIIE | [200] |
| Orshsp70-9  | KDAGRIAGLD | VQRIINEPTA | AALSYGTNNK | G-LIAVFDLG | GGTFDVSILE | [200] |
| Orshsp70-11 | KDAGRIAGLE | VMRIINEPTA | AALSYGMNNK | G-LIAVFDLG | GGTFDVSILE | [200] |
| Orshsp70-10 | KDAGRIAGLD | VQRIINEPTA | AALSYGTNNK | G-LIAVFDLG | GGTFDVSILE | [200] |
| Athsp70-10  | KDAGVIAGLN | VARIINEPTA | AAIAYGLDKK | EKNILVFDLG | GGTFDVSILT | [200] |
| Athsp70-9   | KDAGRIAGLD | VERIINEPTA | AALSYGMTNK | G-LIAVFDLG | GGTFDVSILE | [200] |
| Orshsp70-4  | KDAGVIAGLN | VMRIINEPTA | AAIAYGLDKK | EKNVLIFDLG | GGTFDVSLLT | [200] |
| Crhsp70-2   | KDAGKIAGLE | VLRIINEPTA | AALAYGTDKK | G-LIAVYDLG | GGTFDISILE | [200] |
| Olhsp70-2   | KDAGKIAGLD | VLRIINEPTA | AALSYGVDDK | G-LVAVYDLG | GGTFDVSILE | [200] |
| Othsp70-3   | KDAGKIAGLE | VLRIINEPTA | AALSYGVDDK | G-LVAVYDLG | GGTFDVSILE | [200] |
| Tphsp70-2   | KDAGKIAGLD | VLRIINEPTA | AALAYGMDKA | GKTIAVFDLG | GGTFDVSILE | [200] |
| Cmhs70-2    | KDAGRIAGLN | VLRIINEPTA | AALAYGLDKA | GRVAVYDLG  | GGTFDVSILE | [200] |
| ScECM10     | KDAGQIIGLN | VLRVNEPTA  | AALAYGLDKS | PKVIAVFDLG | GGTFDISILD | [200] |
| ScSSC1      | KDAGQIVGLN | VLRVNEPTA  | AALAYGLEKS | SKVAVVFDLG | GGTFDISILD | [200] |
| Orshsp70-8  | KDAGRIAGLE | VLRIINEPTA | ASLAYGFEEK | NETILVFDLG | GGTFDVSILE | [200] |
| Orshsp70-7  | KDAGRIAGLE | VLRIINEPTA | ASLAYGFEEK | NETILVFDLG | GGTFDVSILE | [200] |
| Athsp70-6   | KDAGRIAGLE | VLRIINEPTA | ASLAYGFDRK | NETILVFDLG | GGTFDVSILE | [200] |
| Athsp70-7   | KDAGRIAGLE | VLRIINEPTA | ASLAYGFERK | NETILVFDLG | GGTFDVSILE | [200] |
| Cchsp70-1   | KDAGKIAGLD | VLRIINEPTA | ASLAYGLDKK | NEKILVFDLG | GGTFDVTILE | [200] |
| Cmhs70-1    | KDAGKIAGLD | VLRIINEPTA | ASLAYGLDKK | NEKILVFDLG | GGTFDVSILE | [200] |
| Athsp70-8   | KDAGKIAGLD | VQRIINEPTA | AALSYGMNNK | G-VIAVFDLG | GGTFDVSILE | [200] |
| Crhsp70-1   | KDAGKIAGLE | VLRIINEPTA | ASLAYGFDDK | NETILVFDLG | GGTFDVSILE | [200] |
| Gthsp70-1   | KDAGQIAGLD | VLRIINEPTA | ASLSYGLDKK | NETILVFDLG | GGTFDVSILE | [200] |
| Guthsp70-1  | KDAGRIAGLE | VLRIINEPTA | ASLAYGLDKK | NETILVFDLG | GGTFDVSILE | [200] |
| Olhsp70-1   | KDAGQIAGIE | VLRIINEPTA | ASLAYGFDRK | NETILIFDLG | GGTFDVSILE | [200] |
| Oshsp70-1   | MDAGKIAGVE | VLRIINEPTA | ASLAYGLDKK | NETILVFDLG | GGTFDVSILE | [200] |
| Pfhs70-1    | KDAGTIAGLN | VMRIINEPTA | AAIAYGLHKK | EKNILIFDLG | GGTFDVSLLT | [200] |
| Phhs70-1    | KDAGKIAGLD | VLRIINEPTA | APLSYGLDKQ | NETILVFDLG | GGTFDVSILE | [200] |
| Pophsp70-1  | KDAGKIAGLD | VLRIINEPTA | ASLSYGLDKQ | NETILVFDLG | GGTFDVSILE | [200] |
| Poyhsp70-1  | KDAGKIAGLD | VLRIINEPTA | ASLSYGLDKQ | NETILVFDLG | GGTFDVSILE | [200] |
| Pyhsp70-2   | KDAGTIAGLN | VMRIINEPTA | AAIAYGLHKK | EKNILIFDLG | GGTFDVSLLT | [200] |
| SyDnaK1     | KDAGTIAGLE | VLRIINEPTA | AALAYGLDKQ | EELILVFDLG | GGTFDVSLLQ | [200] |
| SynDnaK2    | KDAGKIAGIE | VLRIINEPTA | ASLAYGLDKK | NETILVFDLG | GGTFDVSILE | [200] |
| SynDnaK3    | RDAGKIAGLE | VLRIINEPTA | ASLAYGLDQ  | IQKILVFDLG | GGTFDVSILE | [200] |
| Tphsp70-1   | VDAGKIAGIE | VLRIINEPTA | ASLAYGLDKK | NETILVFDLG | GGTFDVSILE | [200] |

|            |            |            |            |            |            |       |
|------------|------------|------------|------------|------------|------------|-------|
| Athsp70-1  | IEEIFEVKAT | AGDTHLGGED | FDNRMVNHV  | QEFKRKSKKD | ITGNPRALRR | [250] |
| Athsp70-2  | IEEIFEVKAT | AGDTHLGGED | FDNRMVNHV  | QEFKRKNKQD | ITGQPRALRR | [250] |
| Athsp70-3  | IEEIFEVKAT | AGDTHLGGED | FDNRMVNHV  | QEFKRKNKKD | ISGNPRALRR | [250] |
| Athsp70-4  | IEEIFEVKAT | AGDTHLGGED | FDNRMVNHV  | QEFKRKNKKD | ITGNPRALRR | [250] |
| Athsp70-5  | IEEVFEVKAT | AGDTHLGGED | FDNRLVNHV  | AEFRRKHKKD | IAGNARALRR | [250] |
| Orshsp70-5 | IEEIFEVKAT | AGDTHLGGED | FDNRMVNHV  | QEFKRKNKKD | ITGNPRALRR | [250] |
| Orshsp70-3 | IEEIFEVKAT | AGDTHLGGED | FDNRMVNHV  | QEFKRKNKKD | ISGNPRALRR | [250] |
| Orshsp70-6 | IEEIFEVKAT | AGDTHLGGED | FDNRLVNHV  | QEFKRKHKKD | ISGNPRALRR | [250] |
| Orshsp70-1 | IEEIFEVKAT | AGDTHLGGED | FDNRMVNHV  | QEFKRKHKKD | ITGNPRALRR | [250] |
| Crhsp70-3  | IEEIFEVKAT | AGDTHLGGED | FDERLVNHFA | NEFORKYKKD | LKTSPRALRR | [250] |
| Olhsp70-4  | IEEIFEVKAT | AGDTHLGGED | FDARLLQHF  | AEFKRKNKKD | ITGNPKALRR | [250] |
| Othsp70-5  | VGDVFEVLST | SGDTHLGGDD | FDKRVVEWLA | DDFKKAEGID | LKNDKQALQR | [250] |



|             |            |            |             |            |            |         |
|-------------|------------|------------|-------------|------------|------------|---------|
| Tphsp70-4   | IEEIFEVKAT | AGDTHLGGED | FDNRMVDYFL  | QDFKRRTKKD | MSQNQRSLRR | [ 250 ] |
| Pfhsp70-2   | IDNVFEVYAT | AGNTHLGGED | FDQRVMDYFI  | KMFKKKNID  | LRTDKRAIQK | [ 250 ] |
| ScSSA1      | IEDIFEVKAT | AGDTHLGGED | FDNRLVNHFI  | QEFKRKNKKD | LSTNQRALRR | [ 250 ] |
| ScSSA2      | IEDIFEVKAT | AGDTHLGGED | FDNRLVNHFI  | QEFKRKNKKD | LSTNQRALRR | [ 250 ] |
| ScSSA3      | IDEVFEVKAT | AGDTHLGGED | FDNRLVNHFLA | TEFKRKTKKD | ISNNQRSLRR | [ 250 ] |
| ScSSA4      | IDEVFEVKAT | AGDTHLGGED | FDSRLVNFLA  | EEFKRKNKKD | LTTNQSLRR  | [ 250 ] |
| Cmhsp70-3   | VDSIFEVRAV | SGNSHLGGED | FDSRMVDYFV  | KEFKRKYKD  | ITGNRRAMRR | [ 250 ] |
| Pyhsp70-3   | ILGVFEVKAT | NGNTSLGGED | FDQRILEYFI  | NEFKKKENID | LKNDKLALQR | [ 250 ] |
| Athsp70-11  | IDNVFEVLST | NGDTHLGGED | FDHRIMEYFI  | KLIKKKHQKD | ISKDNKALGK | [ 250 ] |
| Athsp70-12  | IDNVFEVLST | SGDTHLGGED | FDHRVMDYFI  | KLVKKKYKND | ISKDHKALGK | [ 250 ] |
| Athsp70-13  | IEEIFEVKAT | AGDTHLGGED | FDNRMVNHFV  | QEFKRKNKKD | ISGDARALRR | [ 250 ] |
| Crhsp70-4   | IDNVFEVIST | NGDTHLGGED | FDQRVMEYFI  | KLIKKKYKND | ISGDARALQK | [ 250 ] |
| Crhsp70-5   | IDNVFEVIST | NGDTHLGGED | FDQRVMEYFI  | KLIKKKYKND | ISGDARALQK | [ 250 ] |
| Olhsp70-3   | IDNVFEVIST | NGDTHLGGED | FDQRIMEYFM  | KLIKRKHGKD | VSGDVKAVQK | [ 250 ] |
| Othsp70-1   | IDNVFEVIST | NGDTHLGGED | FDQRIMEYFI  | KLIKRKHGKD | ISSDSKAVQK | [ 250 ] |
| ScKAR2      | IENVFEVQAT | SGDTHLGGED | FDYKIVRQLI  | KAFKKKHGID | VSDNNKALAK | [ 250 ] |
| Orshsp70-15 | IDNVFEVLAT | NGDTHLGGED | FDQRLMDHFV  | KVIRRKHGRD | ITGDARALGK | [ 250 ] |
| Orshsp70-16 | IDNVFEVLAT | NGDTHLGGED | FDQRLMDHFV  | KVIRRKHGRD | IAGDARALGK | [ 250 ] |
| Orshsp70-14 | IDGVYEVLAT | NGDTHLGGED | FDQRVMEHFV  | ELVRRKHGRD | IAGDARALGK | [ 250 ] |
| Orshsp70-13 | LDHVFVLAT  | SGDTHLGGED | FDRRVMDHFI  | RLVKRQHGRD | IGGDGRALGK | [ 250 ] |
| Orshsp70-12 | IDNVFEVLAT | NGDTHLGGED | FDQRIMEYFI  | KLIKKKYKND | ISKDNRALGK | [ 250 ] |
| Cmhsp70-4   | LDDVFEVLAT | NGDTHLGGED | FDQRVMDYLV  | KQFKKKNDLD | LRTDKRAMAK | [ 250 ] |
| Orshsp70-2  | IEEIFEVKAT | AGDTHLGGED | FDNRMVNHFV  | QEFKRKNKKD | ITGNPRALRR | [ 250 ] |
| Tphsp70-5   | IDNVFEVLAT | NGDTHLGGED | FDQRVMDYFI  | KMMKKKSNVD | ISGDKRALQK | [ 250 ] |
| Olhsp70-5   | LQDVFEVLST | AGDTHLGGED | FDTSLAAFAQ  | KEIEKERGDI | --GDEKALRK | [ 250 ] |
| Pfhsp70-3   | ILSVFEVKAT | NGNTSLGGED | FDQRILEYFI  | SEFKKKENID | LKNDKLALQR | [ 250 ] |
| Pyhsp70-1   | IDNVFEVYAT | AGNTHLGGED | FDQRVMDYFI  | KMFKKKNID  | LRSDKRAIQK | [ 250 ] |
| ScSSB1      | IAGVYTVKST | SGNTHLGGQD | FDTNLEHFK   | AEFKKKTGLD | ISDDARALRR | [ 250 ] |
| ScSSB2      | IAGVYTVKST | SGNTHLGGQD | FDTNLEHFK   | AEFKKKTGLD | ISDDARALRR | [ 250 ] |
| Tphsp70-3   | MDSVFEVKAT | GGDTHLGGED | FDNSVMKWCL  | EQI-KAKNDV | LQGNPRAQSR | [ 250 ] |
| Othsp70-2   | LQDVFEVLST | AGDTHLGGED | FDTALAAFAQ  | KEIEKQKQDI | --GDAKSLRK | [ 250 ] |
| Othsp70-4   | IEEIFEVKAT | AGDTHLGGED | FDNRLLOHFI  | QEFKRKHKKD | ITGNPKALRR | [ 250 ] |
| EcolidNaK   | IDETFEVLAT | NGDTHLGGED | FDSRLINYL   | EEFKKQDQID | LRNDPLAMQR | [ 250 ] |
| Orshsp70-9  | ISNVFEVKAT | NGDTFLGGED | FDNTLLEFLV  | SEFKRSEID  | LAKDRLALQR | [ 250 ] |
| Orshsp70-11 | ISNVFEVKAT | NGDTFLGGED | FDGALLDYL   | SEFKKSDNID | LSKDKLALQR | [ 250 ] |
| Orshsp70-10 | ISNVFEVKAT | NGDTFLGGED | FDNTLLEFLV  | SEFKRTEGID | LSKDKLALQR | [ 250 ] |
| Athsp70-10  | IDNVFEVLST | NGDTHLGGED | FDHRVMEYFI  | KLIKKKHQKD | ISKDNKALGK | [ 250 ] |
| Athsp70-9   | ISNVFEVKAT | NGDTFLGGED | FDNALLDFLV  | NEFKTTEGID | LAKDRLALQR | [ 250 ] |
| Orshsp70-4  | IEEIFEVKAT | AGDTHLGGED | FDNRMVNHFV  | LEFKRKNKKD | ISGNPRALRR | [ 250 ] |
| Crhsp70-2   | IMGVFEVKAT | NGDTFLGGED | FDNTILNYLV  | GEFKKESGID | LSKDKLAVQR | [ 250 ] |
| Olhsp70-2   | ISGVFEVKAT | NGDTFLGGED | FDTVLLDHFV  | DNFKKQDQID | LKQDKLAVQR | [ 250 ] |
| Othsp70-3   | ISGVFEVKAT | NGDTFLGGED | FDTVLLDYFV  | DNFKKQDQID | LKQDKLAVQR | [ 250 ] |
| Tphsp70-2   | ISGVFEVKAT | NGNTMLGGED | FDEELLEML   | KTFKKDSGID | LSGDNLAMQR | [ 250 ] |
| Cmhsp70-2   | ISGVFEVKAT | NGDTHLGGED | FDNVLLNHLV  | SEFKKQDQID | LSRDKLALQR | [ 250 ] |
| ScECM10     | IDNIFEVKST | NGDTHLGGED | FDIYLLQEI   | SHFKKETGID | LSNDRMAVQR | [ 250 ] |
| ScSSC1      | IDNVFEVKST | NGDTHLGGED | FDIYLLREIV  | SRFKTETGID | LENDRMAIQR | [ 250 ] |
| Orshsp70-8  | VGDVFEVLST | SGDTHLGGDD | FDKRVVDWLA  | GNFKNDEGID | LLKDKQALQR | [ 250 ] |
| Orshsp70-7  | VGDVFEVLST | SGDTHLGGDD | FDKRVVDWLA  | SNFKKDEGID | LLKDKQALQR | [ 250 ] |

|            |            |            |            |            |            |         |
|------------|------------|------------|------------|------------|------------|---------|
| Athsp70-6  | VGDVFEVLST | SGDTHLGGDD | FDKRVDWLA  | AEFKKDEGID | LLKDKQALQR | [ 250 ] |
| Athsp70-7  | VGDVFEVLST | SGDTHLGGDD | FDKRVDWLA  | STFKKDEGID | LLKDKQALQR | [ 250 ] |
| Cchsp70-1  | IGDIFEVLST | SGDTHLGGDD | FDKKIVDWLV | DEFKKSYNID | LSKDKQALQR | [ 250 ] |
| Cmhs70-1   | IGDVFEVLAT | SGDTHLGGDD | FDKKIVDWLI | DNWKRIEGID | LSKDKQALQR | [ 250 ] |
| Athsp70-8  | ISSVFEVKAT | NGDTFLGGED | FDNTLLEYLV | NEFKRSDNID | LTKDNLALQR | [ 250 ] |
| Crhs70-1   | VGDVFEVLST | SGDTHLGGDD | FDKRIVDFLA | DDFKKSEGID | LRKDRQALQR | [ 250 ] |
| Gthsp70-1  | VGDVFEVLST | SGDTHLGGDD | FDRKIVEWLI | HEFSHDEGIN | LGKDRQALQR | [ 250 ] |
| Guthsp70-1 | VGDVFEVLST | SGDTHLGGDD | FDDKIVQWLL | KEFETEHSIN | LKSDRQALQR | [ 250 ] |
| Olhs70-1   | VGDVFEVLST | SGDTHLGGDD | FDKRIVEWLA | GDFEKSEGID | LMSDKQALQR | [ 250 ] |
| Oshsp70-1  | VGDIFEVLAT | AGDTNLGGDD | FDKVLVRWL  | KEFEDQEGID | LTQDIQALQR | [ 250 ] |
| Pfhs70-1   | IEDIFEVKAT | AGDTHLGGED | FDNRLVNFCV | EDFKRKNRKD | LSKNSRALRR | [ 250 ] |
| Phhs70-1   | VGDVFEVLST | SGDTHLGGDD | FDQQIVEWLI | KDFKQNEGID | LAKDRQALQR | [ 250 ] |
| Pophsp70-1 | VGDVFEVLST | SGDTHLGGDD | FDQQIVEWLI | KDFKQSEGID | LGKDRQALQR | [ 250 ] |
| Poyhs70-1  | VGDVFEVLST | SGDTHLGGDD | FDQQIVEWLI | KDFKQNEGID | LGKDRQALQR | [ 250 ] |
| Pyhs70-2   | IEDIFEVKAT | AGDTHLGGED | FDNRLVNFCV | EDFKRKNRKD | LSKNSRALRR | [ 250 ] |
| SyDnaK1    | LGNVFEVLST | SGNNHLGGDD | FDNCVVQWMA | ESFKQKENID | LSTDKMAIQR | [ 250 ] |
| SynDnaK2   | VGEVFEVLAT | SGDTHLGGDD | FDKKIVDFLA | GEFQKAEGID | LRKDKQALQR | [ 250 ] |
| SynDnaK3   | VGDIFEVKAT | SGDTQLGGND | FDRRIVDWLA | EKFLEAEKVD | LRQDRQALQR | [ 250 ] |
| Tphsp70-1  | VGDIFEVLST | AGDTNLGGDD | FDKALVRWL  | EDFEAKEGTN | LTKDIQALQR | [ 250 ] |
|            |            |            |            |            |            |         |
| Athsp70-1  | LRTSCERAKR | TLSSAQTTI  | EIDSLYEGID | FYSTITRARF | EELNMDLFRK | [ 300 ] |
| Athsp70-2  | LRTACERAKR | TLSSAQTTI  | EIDSLYGGAD | FYSPITRARF | EEMNMDLFRK | [ 300 ] |
| Athsp70-3  | LRTACERAKR | TLSSAQTTI  | EIDSLFDGID | FYAPITRARF | EELNIDLFRK | [ 300 ] |
| Athsp70-4  | LRTACERAKR | TLSSAQTTI  | EIDSLFEGID | FYTTITRARF | EELNMDLFRK | [ 300 ] |
| Athsp70-5  | LRTACERAKR | TLSSAQTTI  | EIDSLHEGID | FYATISRARF | EEMNMDLFRK | [ 300 ] |
| Orshsp70-5 | LRTACERAKR | TLSSAQTTI  | EIDSLYEGID | FYSTITRARF | EELNMDLFRK | [ 300 ] |
| Orshsp70-3 | LRTACERAKR | TLSSAQTTI  | EIDSLYEGID | FYTTITRARF | EELNMDLFRK | [ 300 ] |
| Orshsp70-6 | LRTSCERAKR | TLSSAQTTI  | EIDSLFEGVD | FYSTITRARF | EELNMDLFRK | [ 300 ] |
| Orshsp70-1 | LRTACERAKR | TLSSAQTTI  | EIDSLYEGID | FYATITRARF | EELNMDLFRK | [ 300 ] |
| Crhs70-3   | LRTACERAKR | TLSSAAQTTI | ELDSLFEVD  | FATSITRARF | EELCMDLFRK | [ 300 ] |
| Olhs70-4   | LRSACERAKR | TLSSAQTSI  | EIDSLFEGVD | FYTSITRARF | EELCMDLFRK | [ 300 ] |
| Othsp70-5  | LTEASEKAKM | ELSSSTSSTI | SLPFITATKH | IDTSLTRTKF | EQLCDDLINR | [ 300 ] |
| Tphsp70-4  | LRTACERAKR | TLSSSTQAH  | EIDSLFDGVD | FNSTITRARF | EDLCMDYFKK | [ 300 ] |
| Pfhs70-2   | LRKEVEIAKR | NLSVVHSTQI | EIEDIVEGHN | FSETLTRAKF | EELNDDLFRK | [ 300 ] |
| ScSSA1     | LRTACERAKR | TLSSSAQTSV | EIDSLFEGID | FYTSITRARF | EELCADLFRS | [ 300 ] |
| ScSSA2     | LRTACERAKR | TLSSSAQTSV | EIDSLFEGID | FYTSITRARF | EELCADLFRS | [ 300 ] |
| ScSSA3     | LRTAAERAKR | ALSSSSQTSI | EIDSLFEGMD | FYTSITRARF | EELCADLFRS | [ 300 ] |
| ScSSA4     | LRTAAERAKR | TLSSSAQTSI | EIDSLFEGID | FYTSITRARF | EELCADLFRS | [ 300 ] |
| Cmhs70-3   | LRTACERAKR | TLSSATQATI | EIDSLYNGID | FYSSITRAKF | EELCGDLFRS | [ 300 ] |
| Pyhs70-3   | LREAAETAKI | ELSSKTQTEV | NLPFITANKH | LQIKLTRAKL | EELCHDLLKG | [ 300 ] |
| Athsp70-11 | LRRECERAKR | ALSSQHQRV  | EIESLFDGVD | LSEPLTRARF | EELNNDLFRK | [ 300 ] |
| Athsp70-12 | LRRECELAKR | SLSNQHQVRV | EIESLFDGVD | FSEPLTRARF | EELNMDLFRK | [ 300 ] |
| Athsp70-13 | LRTACERAKR | TLSSAQTTV  | EVDSLFEVD  | FYSTITRAKF | EEMNMDLFRK | [ 300 ] |
| Crhs70-4   | LRREAERAKR | ALSSQHQRV  | EIEALYEGID | LSEPLTRARF | EELNMDLFRK | [ 300 ] |
| Crhs70-5   | LRREAERAKR | ALSSQHQRV  | EIEALYEGID | LSEPLTRARF | EELNMDLFRK | [ 300 ] |
| Olhs70-3   | LRREAERAKR | TLSNQHQVRV | EIEALFDGID | FSEPLTRARF | EELNNDLFRK | [ 300 ] |
| Othsp70-1  | LRREAERAKR | TLSNQHQVRV | EIEALFDGMD | FSEPLTRARF | EELNNDLFRK | [ 300 ] |
| ScKAR2     | LKREAEKAKR | ALSSQMSTRI | EIDSFVDGID | LSETLTRAKF | EELNLDLFRK | [ 300 ] |

|             |            |            |            |            |            |         |
|-------------|------------|------------|------------|------------|------------|---------|
| Orshsp70-15 | LRRECERAKR | ALSNQHQVRV | EVESLFDGVD | LSEPLSRARF | EELNSDLFKK | [ 300 ] |
| Orshsp70-16 | LRRECERAKR | ALSNQHQVRV | EIESLFDGVD | FSEPLSRARF | EELNGDLFKK | [ 300 ] |
| Orshsp70-14 | LRRECERAKR | ALSIQHQVRV | EVESLFDGVD | LSEPLSRARF | EELNNDLFRK | [ 300 ] |
| Orshsp70-13 | LRRECERAKR | ALSRQHQVRV | EIEALFVGVD | FSETLTRAKF | EELNMDLFRK | [ 300 ] |
| Orshsp70-12 | LRREAERAKR | ALSNQHQVRV | EIESLFDGTD | FSEPLTRARF | EELNNDLFRK | [ 300 ] |
| Cmhsp70-4   | LRREVEKAKR | ALSYQTQVRI | EIESIMDGKD | LIEELTRARF | ENLNMDLFRK | [ 300 ] |
| Orshsp70-2  | LRTACERAKR | TLSSTAQTTI | EIDSLYEGID | FYTTITRARF | EELNMDLFRK | [ 300 ] |
| Tphsp70-5   | LRKEVERVKR | ALSSQQQARL | EIEDLAEGFD | FSETLTRARF | EELNNDLFRK | [ 300 ] |
| Olhsp70-5   | LRTACEKAKR | ELS--VANHA | NIECFIGEIE | INMKITREQF | EKVCEPTQR  | [ 300 ] |
| Pfhsp70-3   | LREAAETAKI | ELSSKTQTEI | NLPFITANKH | LQIKLTRAKL | EELCHDLLKG | [ 300 ] |
| Pyhsp70-1   | LRKEVEIAKR | NLSVVHSTQI | EIEDIEGHN  | FSETLTRAKF | EELNDDLFRK | [ 300 ] |
| ScSSB1      | LRTAAERAKR | TLSSVTQTTV | EVDSLFDGED | FESSLTRARF | EDLNAALFKS | [ 300 ] |
| ScSSB2      | LRTAAERAKR | TLSSVTQTTV | EVDSLFDGED | FESSLTRARF | EDLNAALFKS | [ 300 ] |
| Tphsp70-3   | LRAVENAKR  | TLSSSMSTEI | EVDSLVDGFD | FTVTLDRAKF | EELNAVLFRK | [ 300 ] |
| Othsp70-2   | LRTACEKAKR | ELS--VANHA | NIECFIGEHE | INLKVSREEF | NKVNEPTQR  | [ 300 ] |
| Othsp70-4   | LRTACERAKR | TLSSTAQTSV | EIDSLFEGVD | FYTSITRARF | EELCMDLFRK | [ 300 ] |
| EcolidNaK   | LKEAAEKAKI | ELSSAQQTDV | NLPYITADKH | MNIKVTRAKL | ESLVEDLVNR | [ 300 ] |
| Orshsp70-9  | LREAAEKAKI | ELSSTAQTEI | NLPFITADKH | LNITLTRSKF | ESLVNSLIER | [ 300 ] |
| Orshsp70-11 | LREAAEKAKV | ELSSTMQTEI | NLPFITADKH | FNITLTRSKF | ESLVQSLIER | [ 300 ] |
| Orshsp70-10 | LREAAEKAKI | ELSSTAQTEI | NLPFITADKH | LNITLTRSKF | ESLVNSLIER | [ 300 ] |
| Athsp70-10  | LRRECERAKR | ALSSQHQVRV | EIESLFDGVD | FSEPLTRARF | EELNNDLFRK | [ 300 ] |
| Athsp70-9   | LREAAEKAKI | ELSSTSQTEI | NLPFITADKH | FNITLTRSRF | ETLVNHLIER | [ 300 ] |
| Orshsp70-4  | LRTACERAKR | TLSSTAQTTI | EIDSLYEGID | FYSTITRARF | EELNMDLFRK | [ 300 ] |
| Crhsp70-2   | LREASEKAKC | ELSSTTSTDI | NLPFITADKH | LNMQLTRAKL | ELLVKELLER | [ 300 ] |
| Olhsp70-2   | LREAAEKAKI | ELSSAQSTDI | NLPFITADKH | MAMTLRRAKL | EELVGSLLER | [ 300 ] |
| Othsp70-3   | LREAAEKAKI | ELSSAASTDI | NLPFITADKH | MALQLTRAKL | EELVGGLLER | [ 300 ] |
| Tphsp70-2   | LREAAEKAKR | ELDGLAQTDV | SLPFITADKH | LNKITKAQF  | ENMVSELVQK | [ 300 ] |
| Cmhsp70-2   | LREAAEKAKV | ELSSTMQTEI | NLPFITADKH | MNMKLTRAKF | ESLVDHLVQR | [ 300 ] |
| ScECM10     | IREAAEKAKI | ELSSTLSTEI | NLPFITADKH | IRMPFSRVQL | ENITAPLIDR | [ 300 ] |
| ScSSC1      | IREAAEKAKI | ELSSTVSTEI | NLPFITADKH | INMKFSRAQF | ETLTAPLVKR | [ 300 ] |
| Orshsp70-8  | LTEAAEKAKM | ELSSLTQTNI | SLPFITATKH | IETTLTRAKF | EELCSDLLDR | [ 300 ] |
| Orshsp70-7  | LTEAAEKAKM | ELSTLSQTNI | SLPFITATKH | IETTLRRAKF | EELCSDLIDR | [ 300 ] |
| Athsp70-6   | LTEAAEKAKI | ELSSLTQTNM | SLPFITATKH | IETTLTRAKF | EELCSDLLDR | [ 300 ] |
| Athsp70-7   | LTEAAEKAKI | ELSSLTQTNM | SLPFITATKH | IETTLTRGKF | EELCSDLLDR | [ 300 ] |
| Cchsp70-1   | LTEAAEKAKI | ELSSVSQTEI | NLPFITATIH | FDKSLNRAKF | EELVSELIAR | [ 300 ] |
| Cmhsp70-1   | LTEAAEKAKI | ELSNVTQTDI | NLPFITATKH | LDQTLTRAQF | EQLTSDLIER | [ 300 ] |
| Athsp70-8   | LREAAEKAKI | ELSSTTQTEI | NLPFITADKH | LNITLTRSKF | EGLVGKLIER | [ 300 ] |
| Crhsp70-1   | LTEAAEKAKI | ELSGMAQTSI | NLPFITATKH | IDTQLTRAKF | EEMCNDLLER | [ 300 ] |
| Gthsp70-1   | LTEAAEKAKM | ELSSLAQTDI | NLPFITSTKH | LEKNITRAKF | EYLCQDLINR | [ 300 ] |
| Guthsp70-1  | LTEASEKAKI | ELSNLSQTEI | NLPFLTATKH | LERSITRAKF | EELCSDLINR | [ 300 ] |
| Olhsp70-1   | LTEAAEKAKM | ELSTTSSTSI | SLPFITATKH | IDTSLTRPKF | EQLCDDLINR | [ 300 ] |
| Oshsp70-1   | LTEAAEKAKM | ELSTVEKTTI | HLPFITADKH | IEKELTRKTF | ETLCQELIER | [ 300 ] |
| Pfhsp70-1   | LRTQCERAKR | TLSSSTQATI | EIDSLFEGID | YSVTVSRARF | EELCIDYFRD | [ 300 ] |
| Phhsp70-1   | LTEAAEKAKI | ELSNLTQTEI | NLPFITATKH | LEKTVTRGKF | EELCSNLIDK | [ 300 ] |
| Pophsp70-1  | LTEASEKAKI | ELSNLTQTEI | NLPFITATKH | LEKTVTRAKF | EELCSRLIDK | [ 300 ] |
| Poyhsp70-1  | LTEAAEKAKI | ELSNLTQTEI | NLPFITATKH | LEKTVTRGKF | EELCSNLIDK | [ 300 ] |
| Pyhsp70-2   | LRTQCERAKR | TLSSSTQATI | EIDSLFEGID | YSVTVSRARF | EELCIDYFRD | [ 300 ] |
| SyDnaK1     | LREAAEKAKI | ELSSMLNTTI | NLPFITADKH | LEMELARSQF | EELTKQLLED | [ 300 ] |

|             |            |            |            |            |            |         |
|-------------|------------|------------|------------|------------|------------|---------|
| SynDnaK2    | LTEAAEKAKI | ELSGVSQTEI | NLPFITATKH | LDTTLSRAKF | EEICSDLIDR | [ 300 ] |
| SynDnaK3    | LTEAAEKAKI | ELSGVGTTEI | NLPFITATKH | LETQLSRSEF | EDLCGLVTR  | [ 300 ] |
| Tphsp70-1   | LTEAAEKAKM | ELSNVEKTTI | NLPFITADKH | IQQELTREKF | ESLCQDLINR | [ 300 ] |
| Athsp70-1   | CMEPVEKCLR | DAKMDKSTVH | DVVLVGGSTR | IPKVQQLLQD | FFNKELCKSI | [ 350 ] |
| Athsp70-2   | CMEPVEKCLR | DAKMDKSTVH | EIVLVGGSTR | IPKVQQLLQD | FFNKELCKSI | [ 350 ] |
| Athsp70-3   | CMEPVEKCLR | DAKMDKNSID | DVVLVGGSTR | IPKVQQLLVD | FFNKELCKSI | [ 350 ] |
| Athsp70-4   | CMEPVEKCLR | DAKMDKSSVH | DVVLVGGSTR | IPKVQQLLQD | FFNKELCKSI | [ 350 ] |
| Athsp70-5   | CMDPVEKVLK | DAKLDKSSVH | DVVLVGGSTR | IPKIQQLLQD | FFNKELCKSI | [ 350 ] |
| Orshsp70-5  | CMEPVEKCLR | DAKMDKSSVH | DVVLVGGSTR | IPRVQQLLQD | FFNKELCKNI | [ 350 ] |
| Orshsp70-3  | CMEPVEKCLR | DAKMDKSSVH | DVVLVGGSTR | IPKVQQLLQD | FFNKELCKSI | [ 350 ] |
| Orshsp70-6  | CMEPVEKCLR | DAKMDKSTVH | DVVLVGGSTR | IPRVQQLLQD | FFNKELCKSI | [ 350 ] |
| Orshsp70-1  | CMEPVEKCLR | DAKMDKAQIH | DVVLVGGSTR | IPKVQQLLQD | FFNKELCKSI | [ 350 ] |
| Crhsp70-3   | CMDPVEKCLR | DAKMDKMTVH | DVVLVGGSTR | IPKVQQLLQD | FFNKELNKSI | [ 350 ] |
| Olhsp70-4   | CMDPVEKTLR | DAKMDKSQVH | EVVLVGGSTR | IPKVQQLLSD | FFNKDLCKSI | [ 350 ] |
| Othsp70-5   | CKVPVEQALK | DAKLSLSDVD | EVILVGGSTR | IPAVRELVKK | LTSKDPNMSV | [ 350 ] |
| Tphsp70-4   | CMDPCEKVLK | DAKIAKNQVD | EVVLVGGSTR | IPKIQSMLAE | FFNKEPNKGI | [ 350 ] |
| Pfhsp70-2   | TLEPVKKVLD | DAKYEKSKID | EIVLVGGSTR | IPKIQQIIKE | FFNKEPNRGI | [ 350 ] |
| ScSSA1      | TLDPVEKVLK | DAKLDKSQVD | EIVLVGGSTR | IPKVQKLVTD | YFNKEPNRSI | [ 350 ] |
| ScSSA2      | TLDPVEKVLK | DAKLDKSQVD | EIVLVGGSTR | IPKVQKLVTD | YFNKEPNRSI | [ 350 ] |
| ScSSA3      | TLEPVKVLK  | DSKLDKSQID | EIVLVGGSTR | IPKIQKLVSD | FFNKEPNRSI | [ 350 ] |
| ScSSA4      | TLEPVKVLK  | DSKLDKSQID | EIVLVGGSTR | IPKVQKLVSD | FFNKEPNRSI | [ 350 ] |
| Cmhsp70-3   | TLDPVERVLK | DANLSKSQVD | DVVLVGGSTR | IPKIQQLLSQ | FFNKELCKSI | [ 350 ] |
| Pyhsp70-3   | TIEPCEKCIK | DANIKKDEIN | EIILVGMTR  | MPKVSDTVKE | IFQNSPSKSV | [ 350 ] |
| Athsp70-11  | TMGPVKKAMD | DAGLQKSQID | EIVLVGGSTR | IPKVQQLLKD | FFEKEPNKGV | [ 350 ] |
| Athsp70-12  | TMEPVKKALK | DAGLKKSDID | EIVLVGGSTR | IPKVQQLLKD | FFDKEPSKGT | [ 350 ] |
| Athsp70-13  | CMEPVMKCLR | DSKMDKSMVH | DVVLVGGSTR | IPKVQQLLQD | FFNKELCKSI | [ 350 ] |
| Crhsp70-4   | TMGPVKKAMD | DANLKKTEID | EIVLVGGSTR | IPKVQDLLRE | WFGKEPNKGV | [ 350 ] |
| Crhsp70-5   | TMGPVKKAMD | DANLKKTEID | EIVLVGGSTR | IPKVQDLLRE | WFDKEPNKGV | [ 350 ] |
| Olhsp70-3   | TMGPVKKAMD | DAGMKKSEID | EIVLVGGSTR | IPKVQDLLRD | FFDKEPNRGV | [ 350 ] |
| Othsp70-1   | TMGPVKKAMD | DAGMKKSEID | EIVLVGGSTR | IPKVQDLLRD | FFDKEPNKGV | [ 350 ] |
| ScKAR2      | TLKPVEKVLQ | DSGLEKKDVD | DIVLVGGSTR | IPKVQQLLES | YFDKKASKGI | [ 350 ] |
| Orshsp70-15 | TMVPVRKAMA | DARLSKGDID | EIVLVGGSTR | IPKVQQLLKD | YFGKEPNRGV | [ 350 ] |
| Orshsp70-16 | TMVPVRKAMA | DAGLGKGDID | EIVLVGGSTR | IPKVQQLLKD | YFGKEPNRGV | [ 350 ] |
| Orshsp70-14 | TMAPVRKAMA | DARLSNADID | EIVLVGGSTR | IPKVRQLLRD | YFGKQPNQGV | [ 350 ] |
| Orshsp70-13 | TLGPVRKAIA | DAKLLKSDID | EIVLVGGSTR | IPKVQELLKE | MFDKEPTKGI | [ 350 ] |
| Orshsp70-12 | TMGPVKKAMD | DAGLEKSQIH | EIVLVGGSTR | IPKVQQLLRD | YFEKEPNKGV | [ 350 ] |
| Cmhsp70-4   | TLKPVEIVLK | DAKKEKID   | EIVLVGGSTR | IPKIQELITE | FFDKQPSKGI | [ 350 ] |
| Orshsp70-2  | CMEPVEKCLR | DAKMDKSTVH | DVVLVGGSTR | IPRVQQLLQD | FFNKELCKSI | [ 350 ] |
| Tphsp70-5   | TLGPVGRVLE | DADVSKSEVD | EIVLVGGSTR | IPKVQSLISE | FFGKEPSKGI | [ 350 ] |
| Olhsp70-5   | CLDSVKRVLS | DAGKKKEEVD | EIVLVGGSTR | VPRVQGILTE | YFDKTLNKSV | [ 350 ] |
| Pfhsp70-3   | TIEPCEKCIK | DADVKKEEIN | EIILVGMTR  | MPKVTDTVQK | IFQNNPSKGV | [ 350 ] |
| Pyhsp70-1   | TLEPVKKVLD | DAKYEKSKID | EIVLVGGSTR | IPKIQQIIKD | FFNKEPNRGI | [ 350 ] |
| ScSSB1      | TLEPVQVLK  | DAKISKSQID | EVVLVGGSTR | IPKVQKLLSD | FFDKQLEKSI | [ 350 ] |
| ScSSB2      | TLEPVQVLK  | DAKISKSQID | EVVLVGGSTR | IPKVQKLLSD | FFDKQLEKSI | [ 350 ] |
| Tphsp70-3   | CIDTVNEVLN | DAGCSQDEV  | DLVLVGGSTR | IPSLQTSLYD | MFGIELCKSV | [ 350 ] |
| Othsp70-2   | CMDAVKRVLS | DASRKKEEVN | EIVLVGGSTR | VPRVQEILTE | YFDKPLNKSV | [ 350 ] |
| Othsp70-4   | CMDPVEKCLR | DSKMDKSSVH | EVVLVGGSTR | IPKVQQLLSD | FFNKELCKSI | [ 350 ] |

|             |             |             |            |             |            |         |
|-------------|-------------|-------------|------------|-------------|------------|---------|
| EcoliDnaK   | SIEPLKVALQ  | DAGLSVSDID  | DVILVGGQTR | MPMVQKKVAE  | FFGKEPRKDV | [ 350 ] |
| Orshsp70-9  | TREPCKNCLK  | DAGITTKEDV  | EVLLVGGMTR | VPKVQEIIVSE | IFGKSPSKGV | [ 350 ] |
| Orshsp70-11 | TRIPCVNCLK  | DAGVSAKDID  | EVLLVGGMTR | VPKVQDIVSQ  | IFNKTPSKGV | [ 350 ] |
| Orshsp70-10 | TRDPCKSCLK  | DAGITTKDVD  | EVLLVGGMTR | VPKVQEVVSE  | IFGKAPSKGV | [ 350 ] |
| Athsp70-10  | TMGPVKKAMD  | DAGLQKSQID  | EIVLVGGSTR | IPKVQQLLKD  | FFEKEPNKGV | [ 350 ] |
| Athsp70-9   | TRDPCKNCLK  | DAGISAKEVD  | EVLLVGGMTR | VPKVQSIVAE  | IFGKSPSKGV | [ 350 ] |
| Orshsp70-4  | CMEPVKCLR   | DAKMDKSSVH  | DVLLVGGSTR | IPKVQQLLQD  | FFNKELCKSI | [ 350 ] |
| Crhsp70-2   | TKQPCLQAMK  | DAGVQPKDIQ  | EVLLVGGMTR | MPKVNEIVKE  | VFQRDPSKGV | [ 350 ] |
| Olhsp70-2   | TKQPCKNCLK  | DAGVSTGEIS  | EVLLVGGMSR | MPKVQGIKVD  | LFGRDPSKGV | [ 350 ] |
| Othsp70-3   | TKQPCKNCLK  | DAGVSTSEIS  | EVLLVGGMSR | MPKVQGIKVD  | LFGREPSKGV | [ 350 ] |
| Tphsp70-2   | TVDPCKQCMK  | DADVSKAEIH  | EVILVGGMTR | MPKVQETVEN  | FFGKKPSRGV | [ 350 ] |
| Cmhs70-2    | TLEPMKLCLK  | DAGMSAKDIS  | DVLLVGGMTR | VPAVQRLVQD  | FFGRAPNKS  | [ 350 ] |
| ScECM10     | TVDPVKKALK  | DARITASDIS  | DVLLVGGMSR | MPKVADTVKK  | LFGKDASKAV | [ 350 ] |
| SSSC1       | TVDPVKKALK  | DAGLSTSDIS  | EVLLVGGMSR | MPKVVEIVKS  | LFGKDPSKAV | [ 350 ] |
| Orshsp70-8  | L RTPVDNALR | DAKLSFKDID  | EVILVGGSTR | IPAVQDLVKK  | MTGKDPNVT  | [ 350 ] |
| Orshsp70-7  | LKTPVTNALR  | DAKLSVDNLD  | EVILVGGSTR | IPSVQELVKK  | ITGKDPNVT  | [ 350 ] |
| Athsp70-6   | VRTPVENSLR  | DAKLSFKDID  | EVILVGGSTR | IPAVQELVRK  | VTGKEPNVT  | [ 350 ] |
| Athsp70-7   | VRTPVENSLR  | DAKLSFKDID  | EVILVGGSTR | IPAVQDLVRK  | LTGKEPNVSV | [ 350 ] |
| Cchsp70-1   | CKIPVENALK  | DAKLNKSDIN  | EIVLVGGSTR | IPAIQNLVKE  | SLQKDPNQTV | [ 350 ] |
| Cmhs70-1    | CRKPVEQALT  | DAKLSKQDID  | EVVLVGGSTR | IPAVQQLVKD  | LLGKQPNQSV | [ 350 ] |
| Athsp70-8   | TRSPCQCNCLK | DAGVTIKEYD  | EVLLVGGMTR | VPKVQEIIVSE | IFGKSPCKGV | [ 350 ] |
| Crhsp70-1   | CKVPVQOALR  | DAKLSISDIQ  | EVILVGGSTR | IPAVQEIIVRK | LSGKDPNVT  | [ 350 ] |
| Gthsp70-1   | CEIPVNNALK  | DAQLSSGNID  | EIVLVGGSTR | IPAIQQLVKK  | MIGKDPNQSV | [ 350 ] |
| Guthsp70-1  | VKIPVENALK  | DAKLDSSKID  | EVVLVGGSTR | IPAIQELVKR  | ILNKTPNQTV | [ 350 ] |
| Olhsp70-1   | CKVPVQOALK  | DAKLSLAEVD  | EVILVGGSTR | IPAIQELVKS  | LTKKEPNMSV | [ 350 ] |
| Oshsp70-1   | CQIPVEKALT  | DARLEKSDIN  | EVVLVGGSTR | IPAIQNLVES  | LTNKKPNQSV | [ 350 ] |
| Pfhs70-1    | TLIPVEKVLK  | DAMMDKKSVDH | EVVLVGGSTR | IPKIQTLIKE  | FFNKEACRSI | [ 350 ] |
| Phhs70-1    | CSIPVNNALK  | DAKLEASSID  | EVVLVGGSTR | IPAIQQMVKR  | LIGKDPNQSV | [ 350 ] |
| Pophsp70-1  | CSIPVNNALK  | DAKLEASSID  | EVVLVGGSTR | IPAIQQMVKR  | LIGKDPNQSV | [ 350 ] |
| Poyhsp70-1  | CSIPVNNALK  | DAKLEASSID  | EVVLVGGSTR | IPAIQQMVKR  | LIGKDPNQSV | [ 350 ] |
| Pyhsp70-2   | TLIPVEKVLK  | DAMMDKKSVDH | EVVLVGGSTR | IPKIQTLIKE  | FFNKEACRSI | [ 350 ] |
| SyDnaK1     | TRVPLTQALD  | DGEIRASDVH  | RVILVGGSTR | IPAIQRVIQE  | FFPSQLERSV | [ 350 ] |
| SynDnaK2    | CGIPVENAIR  | DAKIDKSALD  | EIVLVGGSTR | IPAVQEVVKK  | ILGKDPNQGV | [ 350 ] |
| SynDnaK3    | LQRPVKRVLK  | DAGLSPVQID  | EVVLVGGSTR | MPMVKGLVRS  | FIDREPNEV  | [ 350 ] |
| Tphsp70-1   | CRIPVEKALK  | DAKLDQSGIN  | EVVLVGGSTR | IPAIQQLVES  | LTGKKPNKSV | [ 350 ] |

|            |            |            |            |            |            |         |
|------------|------------|------------|------------|------------|------------|---------|
| Athsp70-1  | NPDEAVAYGA | AVQGAILSGD | LLLLDVTPLS | LGLETAGGVM | TTLIPRNTTI | [ 400 ] |
| Athsp70-2  | NPDEAVAYGA | AVQAAILSGD | LLLLDVTPLS | LGLETAGGVM | TTLIQRNTTI | [ 400 ] |
| Athsp70-3  | NPDEAVAYGA | AVQAAILSGD | LLLLDVTPLS | LGLETAGGVM | TVLIQRNTTI | [ 400 ] |
| Athsp70-4  | NPDEAVAYGA | AVQAAILSGD | LLLLDVTPLS | LGLETAGGVM | TVLIPRNTTI | [ 400 ] |
| Athsp70-5  | NPDEAVAYGA | AVQAAILTGD | LLLLDVAPLS | LGLETAGGVM | TVLIPRNTTV | [ 400 ] |
| Orshsp70-5 | NPDEAVAYGA | AVQAAILSGD | LLLLDVTPLS | LGLETAGGVM | TVLIPRNTTI | [ 400 ] |
| Orshsp70-3 | NPDEAVAYGA | AVQAAILSGD | LLLLDVTPLS | LGLETAGGVM | TVLIPRNTTI | [ 400 ] |
| Orshsp70-6 | NPDEAVAYGA | AVQAAILSGD | LLLLDVTPLS | LGLETAGGVM | TVLIPRNTTI | [ 400 ] |
| Orshsp70-1 | NPDEAVAYGA | AVQAAILSGD | LLLLDVTPLS | LGLETAGGVM | TVLIPRNTTI | [ 400 ] |
| Crhsp70-3  | NPDEAVAYGA | AVQAAILTGD | LLLLDVTPLS | LGLETAGGVM | TVLIPRNTTI | [ 400 ] |
| Olhsp70-4  | NPDEAVAYGA | AVQAAILSGD | LLLLDVSPLS | MGLETVGGVM | TVLIPRNTTI | [ 400 ] |
| Othsp70-5  | NPDEVVALGA | AVQAGVLAGD | IVLLDVTPLS | LGLETGGVM  | TKLIPRNTTL | [ 400 ] |

|             |            |             |            |            |             |         |
|-------------|------------|-------------|------------|------------|-------------|---------|
| Tphsp70-4   | NPDEAVAYGA | TVQAAILSGE  | LLLLDVTPLS | LGLETAGGVM | TTLIKRNTTV  | [ 400 ] |
| Pfhsp70-2   | NPDEAVAYGA | AIQAGIILGD  | VLLDVTPLT  | LGIETVGGIM | TQLIKRNTVI  | [ 400 ] |
| ScSSA1      | NPDEAVAYGA | AVQAAILTGD  | LLLLDVAPLS | LGIETAGGVM | TKLIPRNSTI  | [ 400 ] |
| ScSSA2      | NPDEAVAYGA | AVQAAILTGD  | LLLLDVAPLS | LGIETAGGVM | TKLIPRNSTI  | [ 400 ] |
| ScSSA3      | NPDEAVAYGA | AVQAAILTGD  | LLLLDVAPLS | LGIETAGGIM | TKLIPRNSTI  | [ 400 ] |
| ScSSA4      | NPDEAVAYGA | AVQAAILTGD  | LLLLDVAPLS | LGIETAGGIM | TKLIPRNSTI  | [ 400 ] |
| Cmhsp70-3   | NPDEAVAYGA | AVQAAILSGD  | ILLLDVTPLS | LGIETAGGVM | TVLIPRNSTI  | [ 400 ] |
| Pyhsp70-3   | NPDEAVALGA | AIQGGVLKGD  | LLLLDVIPLS | LGIETLGGVF | TKLINRNNTTI | [ 400 ] |
| Athsp70-11  | NPDEAVAYGA | AVQGGILSGD  | ILLLDVAPLT | LGIETVGGVM | TKLIPRNNTVI | [ 400 ] |
| Athsp70-12  | NPDEAVAYGA | AVQGGVLSGD  | ILLLDVAPLS | LGIETVGGVM | TNIIPRNNTVI | [ 400 ] |
| Athsp70-13  | NPDEAVAYGA | AVQAAILSGD  | LLLLDVTPLS | LGIETIGGVM | TTLIQRNTTI  | [ 400 ] |
| Crhsp70-4   | NPDEAVAYGA | AVQGAILSGG  | LIVIDRTPLS | LGIETTGGVM | TNLIPRNSVI  | [ 400 ] |
| Crhsp70-5   | NPDEAVAYGA | AVQGGILGGD  | ILLLDVAPLS | LGIETVGGVM | TKLIPRNNTVI | [ 400 ] |
| Olhsp70-3   | NPDEAVAYGA | AVQGGILSGD  | ILLLDVAPLT | QGIETVGGVM | TKLIPRNNTVI | [ 400 ] |
| Othsp70-1   | NPDEAVAYGA | AVQGGILSGD  | ILLLDVAPLT | QGIETVGGVM | TKLIPRNNTVI | [ 400 ] |
| ScKAR2      | NPDEAVAYGA | AVQAGVLSGD  | IVLLDVNALT | LGIETTGGVM | TPLIKRNTAI  | [ 400 ] |
| Orshsp70-15 | NPDEAVAYGA | AVQASIIISGS | MILLDVAPLT | LGLETAGGVM | AKLIPRNNTV  | [ 400 ] |
| Orshsp70-16 | NPDEAVAYGA | AVQASIIISGS | MILLDVAPLT | LGLETAGGVM | TKLIPRNNTV  | [ 400 ] |
| Orshsp70-14 | NPDEAVAYGA | AIQANIVGGD  | MVLLDVTPLT | LGLETAGGVM | ATLIPRNTPV  | [ 400 ] |
| Orshsp70-13 | NPDEAVAYGA | AVQGSIIISGD | ILLLDVTPLT | LGIETAGGVM | TKLIPRNTRI  | [ 400 ] |
| Orshsp70-12 | NPDEAVAYGA | AVQGSILSGD  | ILLLDVAPLT | LGIETVGGVM | TKLIPRNNTVI | [ 400 ] |
| Cmhsp70-4   | NPDEAVAYGA | AVQGAILSGD  | ILLLDVTPLS | LGIETVGGVM | TKIINRGTTI  | [ 400 ] |
| Orshsp70-2  | NPDEAVAYGA | AVQAAILTGD  | LLLLDVTPLS | QGLETAGGVM | TVLIPRNNTTI | [ 400 ] |
| Tphsp70-5   | NPDEAVAYGA | AVQGGILSGE  | ILLLDVTPLS | QGIETVGGVM | TKLINRGTTI  | [ 400 ] |
| Olhsp70-5   | HPDEAVAYGA | AVQGAILAGR  | VLLMDVVPLS | LGVECEGRQF | AKVVQRNTAI  | [ 400 ] |
| Pfhsp70-3   | NPDEAVALGA | AIQGGVLKGD  | LLLLDVIPLS | LGIETLGGVF | TKLINRNNTTI | [ 400 ] |
| Pyhsp70-1   | NPDEAVAYGA | AIQAGIILGD  | VLLDVTPLT  | LGIETVGGIM | TQLIKRNTVI  | [ 400 ] |
| ScSSB1      | NPDEAVAYGA | AVQGAILTGD  | LLLLDVAPLS | LGVGMQGMF  | GIVVPRNTTV  | [ 400 ] |
| ScSSB2      | NPDEAVAYGA | AVQGAILTGD  | LLLLDVAPLS | LGVGMQGDIF | GIVVPRNTTV  | [ 400 ] |
| Tphsp70-3   | HPDEAVAHGA | AVQGHILATD  | LLLLDVTPLS | LGIELEGKQM | STLIKRNTAI  | [ 400 ] |
| Othsp70-2   | HPDEAVAYGA | AVQGAILAGR  | VLLMDVVPLS | LGVECEGRQF | AKVVPRNTSI  | [ 400 ] |
| Othsp70-4   | NPDEAVAYGA | AVQAAILSGD  | LLLLDVSPLS | MGLETVGGVM | TVLIPRNNTTI | [ 400 ] |
| EcolidNaK   | NPDEAVAIGA | AVQGGVLTGD  | VLLLDVTPLS | LGIETMGGVM | TTLIAKNTTI  | [ 400 ] |
| Orshsp70-9  | NPDEAVAMGA | AIQGGILRGE  | LLLLDVTPLS | LGIETLGGIF | TRLINRNNTTI | [ 400 ] |
| Orshsp70-11 | NPDEAVAMGA | AIQGGILRGE  | LLLLDVTPLS | LGIETLGGIF | TRLINRNNTTI | [ 400 ] |
| Orshsp70-10 | NPDEAVAMGA | AIQGGILRGD  | LLLLDVTPLS | LGIETLGGIF | TRLINRNNTTV | [ 400 ] |
| Athsp70-10  | NPDEAVAYGA | AVQGGILSGD  | ILLLDVAPLT | LGIETVGGVM | TKLIPRNNTVI | [ 400 ] |
| Athsp70-9   | NPDEAVAMGA | ALQGGILRGE  | LLLLDVTPLS | LGIETLGGVF | TRLITRNNTTI | [ 400 ] |
| Orshsp70-4  | NPDEAVAYGA | AVQAAILSGD  | LLLLDVTPLS | LGLETAGGVM | TVLIPRNNTTI | [ 400 ] |
| Crhsp70-2   | NPDEVVAMGA | AIQGGVLRGD  | ILLLDVTPLS | LGIETLGGVF | TRMINRNNTTI | [ 400 ] |
| Olhsp70-2   | NPDEVVAMGA | AIQGGVLRGD  | ILLLDVTPLS | LGIETLGGVF | TRLISRNTTI  | [ 400 ] |
| Othsp70-3   | NPDEVVAMGA | AIQGGVLRGD  | ILLLDVTPLS | LGIETLGGVF | TRLISRNTTI  | [ 400 ] |
| Tphsp70-2   | NPDEVVAMGA | AIQGGVLKGD  | ILLLDVTPLS | LGIETLGGVM | TKLIPRNNTTI | [ 400 ] |
| Cmhsp70-2   | NPDEVVAMGA | AIQGGVLRGD  | ILLLDVTPLS | LGIETLGGVF | TKLIPRNSTI  | [ 400 ] |
| ScSCECM10   | NPDEAVALGA | AIQA AVLSGD | VLLLDVTPLS | LGIETLGGVF | TKLIPRNSTI  | [ 400 ] |
| ScSSC1      | NPDEAVAIGA | AVQGAVLSGD  | VLLLDVTPLS | LGIETLGGVF | TRLIPRNNTTI | [ 400 ] |
| Orshsp70-8  | NPDEVVALGA | AVQAGVLSGD  | IVLLDVTPLS | LGLETLGGVM | TKIIPRNNTL  | [ 400 ] |
| Orshsp70-7  | NPDEVVSLGA | AVQGGVLAGD  | VLLLDVTPLS | LGLETLGGVM | TKIIPRNNTL  | [ 400 ] |

|            |            |            |            |             |             |       |
|------------|------------|------------|------------|-------------|-------------|-------|
| Athsp70-6  | NPDEVVALGA | AVQAGVLAGD | IVLLDVTPLS | IGLETLLGGVM | TKIIPRNTTL  | [400] |
| Athsp70-7  | NPDEVVALGA | AVQAGVLSGD | IVLLDVTPLS | LGLETLLGGVM | TKIIPRNTTL  | [400] |
| Cchsp70-1  | NPDEVVAVGA | AIQAGVLAGD | ILLLDVCPLS | LGVETLLGGVM | TKMIPKNTTI  | [400] |
| Cmhs70-1   | NPDEVVAIGA | AIQAGVLAGN | ILLLDVCPLS | LGVETLLGGIM | TKMIPRNTTI  | [400] |
| Athsp70-8  | NPDEAVAMGA | AIQGGILRGD | LLLLDVVPLS | LGIETLGAVF  | TKLIIPRNTTI | [400] |
| Crhs70-1   | NPDEVVALGA | AVQAGVLAGD | IVLLDVTPLS | LGLETLLGGVM | TKLIIPRNTTL | [400] |
| Gthsp70-1  | NPDEVVAIGA | AVQAGVLAGD | ILLLDVTPLS | LGVETLLGGVM | TKIIDRNTTV  | [400] |
| Guthsp70-1 | NPDEVVAIGA | AVQAGVLAGD | ILLLDVTPLS | LGVETLLGGVT | TRIIIPRNTTI | [400] |
| Olhsp70-1  | NPDEVVALGA | AVQAGVLAGD | IVLLDVTPLS | LGLETLLGGVM | TKLIIPRNTTL | [400] |
| Oshsp70-1  | NPDEVVAIGA | AIQAGILAGD | VLLLDVTPLS | LGVETLLGGVM | TKIIARNNTTI | [400] |
| Pfhsp70-1  | NPDEAVAYGA | AVQAAILSGD | LLLLDVCPLS | LGLETAGGVM  | TKLIERNNTTI | [400] |
| Phhsp70-1  | NPDEVVAIGA | AVQAGVLAGD | ILLLDVTPLS | LGVETLLGGVM | TKIIPRNTTI  | [400] |
| Pophsp70-1 | NPDEVVAIGA | AVQAGVLAGD | ILLLDVTPLS | LGVETLLGGVM | TKIIPRNTTI  | [400] |
| Poyhsp70-1 | NPDEVVAIGA | AVQAGVLAGD | ILLLDVTPLS | LGVETLLGGVM | TKIIPRNTTI  | [400] |
| Pyhsp70-2  | NPDEAVAYGA | AVQAAILSGD | LLLLDVCPLS | LGLETAGGVM  | TKLIERNNTTI | [400] |
| SyDnaK1    | NPDEAVALGA | AIQAGVIGGD | VLLLDVTPLS | LGLETLLGEVT | TKIIERNNTTI | [400] |
| SynDnaK2   | NPDEVVAVGA | AIQGGVLSGD | ILLLDVSPLS | LGVETLLGGVM | TKIIPRNTTI  | [400] |
| SynDnaK3   | NPDEVVAIGA | AIQAGILDGD | ILLLDVTPLS | FGLETIGGVM  | KKLLPRNTTI  | [400] |
| Tphsp70-1  | NPDEVVAIGA | AIQAGILAGD | ILLLDVTPLS | LGVETVGGIM  | TKLISRNTTI  | [400] |
|            |            |            |            |             |             |       |
| Athsp70-1  | PTKKEQVFST | YSDNQPGVLI | QVYEGERART | KDNNLLGKFE  | LSGIPPAPRG  | [450] |
| Athsp70-2  | PTKKEQVFST | YSDNQPGVLI | QVFEGERART | KDNNLLGKFE  | LSGIPPAPRG  | [450] |
| Athsp70-3  | PTKKEQVFST | YSDNQPGVLI | QVYEGERART | KDNNLLGKFE  | LSGIPPAPRG  | [450] |
| Athsp70-4  | PTKKEQIFST | YSDNQPGVLI | QVYEGERART | KDNNLLGKFE  | LSGIPPAPRG  | [450] |
| Athsp70-5  | PCKKEQVFST | YADNQPGVLI | QVYEGERART | RDNNLLGTFE  | LKGIPPAPRG  | [450] |
| Orshsp70-5 | PTKKEQVFST | YSDNQPGVLI | QVYEGERTRT | RDNNLLGKFE  | LSGIPPAPRG  | [450] |
| Orshsp70-3 | PTKKEQVFST | YSDNQPGVLI | QVYEGERART | KDNNLLGKFE  | LSGIPPAPRG  | [450] |
| Orshsp70-6 | PTKKEQVFST | YSDNQPGVLI | QVYEGERTRT | RDNNLLGKFE  | LSGIPPAPRG  | [450] |
| Orshsp70-1 | PTKKEQVFST | YSDNQPGVLI | QVYEGERTRT | KDNNLLGKFE  | LTGIPPAPRG  | [450] |
| Crhs70-3   | PTKKEQVFST | YSDNQPGVLI | QVYEGERART | KDNNLLGKFE  | LTGIPPAPRG  | [450] |
| Olhsp70-4  | PTKKEQVFST | YSDNQPGVLI | QVFEGERSRT | RDNHLLGKFE  | LSGIPPAPRG  | [450] |
| Othsp70-5  | PTSKSEVFST | AADGQTSVEI | NVLQGEREFV | KDNKSLGTFR  | LDGIPSAP--  | [450] |
| Tphsp70-4  | PAKKTQTFST | YADNQPGVLI | QVFEGERSMT | RDNNLLGKFN  | LDGIPPMPRG  | [450] |
| Pfhsp70-2  | PTKKSQTFST | YQDNQPAVLI | QVFEGERALT | KDNHLLGKFE  | LSGIPPAQRG  | [450] |
| ScSSA1     | PTKKSEIFST | YADNQPGVLI | QVFEGERAKT | KDNNLLGKFE  | LSGIPPAPRG  | [450] |
| ScSSA2     | PTKKSEVFST | YADNQPGVLI | QVFEGERAKT | KDNNLLGKFE  | LSGIPPAPRG  | [450] |
| ScSSA3     | PTKKSETFST | YADNQPGVLI | QVFEGERTRT | KDNNLLGKFE  | LSGIPPAPRG  | [450] |
| ScSSA4     | PTKKSEVFST | YADNQPGVLI | QVFEGERTRT | KDNNLLGKFE  | LSGIPPAPRG  | [450] |
| Cmhs70-3   | PTKKSQIFTT | YADNQPAVTI | QVYEGERAMT | KDNHLLGQFT  | LTGIPPAPRG  | [450] |
| Pyhsp70-3  | PTKKSQVFST | AADNQTVSI  | KVFQGEREMA | CDNKMLGSFD  | LVGIPPAPRG  | [450] |
| Athsp70-11 | PTKKSQVFTT | YQDQQTTSI  | QVFEGERSLT | KDCRLLGKFD  | LTGVPPAPRG  | [450] |
| Athsp70-12 | PTKKSQVFTT | YQDQQTTSI  | QVFEGERSMT | KDNRELGKFD  | LTGILPAPRG  | [450] |
| Athsp70-13 | PAKKEQEFST | TVDNQPDVLI | QVYEGERART | IDNNILGQFV  | LSGIPPAPRG  | [450] |
| Crhs70-4   | PTKKSQTFST | AADNQPTVSI | QVYEGERALT | KDNHKLQGF   | LNGIPPAPRG  | [450] |
| Crhs70-5   | PTKKSQTFST | YQDQQTTSI  | QVYEGERAMT | KDNHKLQGF   | LNGIPPAPRG  | [450] |
| Olhsp70-3  | PTKKSQTFST | YQDNQQTVM  | QVFEGERAMT | KDNHLLGKFE  | LTSIPPAPRG  | [450] |
| Othsp70-1  | PTKKSQTFST | YQDNQQTVM  | QVFEGERAMT | KDNHLLGKFE  | LTSIPPAPRG  | [450] |
| ScKAR2     | PTKKSQIFST | AVDNQPTVM  | KVYEGERAMS | KDNNLLGKFE  | LTGIPPAPRG  | [450] |

|             |            |            |            |            |            |         |
|-------------|------------|------------|------------|------------|------------|---------|
| Orshsp70-15 | PTKKTQVFTT | YKDKQTTVTI | QVFEGERSMT | RDNRLLGKFD | LAGIAPAPRG | [ 450 ] |
| Orshsp70-16 | PTKKTQVFTT | YKDRQTTVTI | QVFEGERSMT | RDNRLLGKFD | LTGIAPAPRG | [ 450 ] |
| Orshsp70-14 | PTKRAQLFST | YKDKQTTVTV | KVFEGERSMT | RDNRLLGKFD | LAGIAPAPRG | [ 450 ] |
| Orshsp70-13 | PVKKSQVFTT | YEDHQTTVSI | KVFEGERSLT | KDCRELGRFD | LSGIAPAPRG | [ 450 ] |
| Orshsp70-12 | PTKKSQVFTT | YQDQOTTVSI | QVFEGERSMT | KDCRLLGKFD | LSGIPAAPRG | [ 450 ] |
| Cmhsp70-4   | PTKKSQIFST | HVDRQSSVLI | QVYEGERVAT | KDNHLLGKFE | LTGIPPAPRG | [ 450 ] |
| Orshsp70-2  | PTKKEQVFST | YSDNQPGVLI | QVYEGERTRT | KDNHLLGKFE | LSGIPPAPRG | [ 450 ] |
| Tphsp70-5   | PTKKSQTFST | HQDNQPAVLI | QVFEGERSMT | KDNHLLGKFE | LTGIPPAPRG | [ 450 ] |
| Olhsp70-5   | PCKKKSEFTT | VYDNQDEIDV | RIFEGERSNT | DGNHLLGEFQ | ISGIERASAG | [ 450 ] |
| Pfhsp70-3   | PTKKSQIFST | AADNQTVQSI | KVFQGEREMA | SDNKLLGSFD | LVGIPPAPRG | [ 450 ] |
| Pyhsp70-1   | PTKKSQTFST | YQDNQPAVLI | QVFEGERALT | KDNHLLGKFE | LSGIPPAQRG | [ 450 ] |
| ScSSB1      | PTIKRRTFTT | CADNQTTVQF | PVYQGERVNC | KENTLLGEFD | LKNIPMMPAG | [ 450 ] |
| ScSSB2      | PTIKRRTFTT | VSDNQTTVQF | PVYQGERVNC | KENTLLGEFD | LKNIPMMPAG | [ 450 ] |
| Tphsp70-3   | PCKKTRTYTT | VDDWQTEIDV | VVFEGERPHV | DANNKLGsfv | ISGVQRARAG | [ 450 ] |
| Othsp70-2   | PCKKKSEFTT | VYDNQDEIDV | RIFEGEQNT  | DGNHLLGEFQ | ISGIERASAG | [ 450 ] |
| Othsp70-4   | PTKKEQVFST | YSDNQPGVLI | QVFEGERSRT | RDNHLLGKFE | LSGIPPAPRG | [ 450 ] |
| EcoliDnaK   | PTKKSQVFST | AEDNQSAVTI | HVLQGERKRA | ADNKSLGQFN | LDGINPAPRG | [ 450 ] |
| Orshsp70-9  | PTKKSQVFST | AADNQTVQGI | RVLQGEREMA | TDNKLLGEFD | LVGIPPAPRG | [ 450 ] |
| Orshsp70-11 | PTKKSQVFST | AADNQTVQGI | KVLQGEREMA | TDNKLLGEFQ | LEGIPPAPRG | [ 450 ] |
| Orshsp70-10 | PTKKSQVFST | AADNQTVQGI | KVLQGEREMA | ADNKLLGEFD | LVGIPPAPRG | [ 450 ] |
| Athsp70-10  | PTKKSQVFTT | YQDQOTTVSI | QVFEGERSLT | KDCRLLGKFD | LNGIPPAPRG | [ 450 ] |
| Athsp70-9   | PTKKSQVFST | AADNQTVQGI | RVLQGEREMA | TDNKLLGEFD | LVGIPPSPRG | [ 450 ] |
| Orshsp70-4  | PTKKEQVFST | YSDNQPGVLI | QVYEGERTRT | KDNHLLGKFE | LSGIPPAPRG | [ 450 ] |
| Crhsp70-2   | PTKKSQVFST | AADNQTVQGI | KVFQGEREMA | ADNKLLGQFD | LVGIPPAPRG | [ 450 ] |
| Olhsp70-2   | PTKKSQTFST | AADNQTVQGI | KVLQGEREMA | ADNKTLGQFD | LVGIPPAPRG | [ 450 ] |
| Othsp70-3   | PTKKSQTFST | AADNQTVQGI | KVLQGEREMA | ADNKTLGQFD | LVGIPPAPRG | [ 450 ] |
| Tphsp70-2   | PTKKQOTFST | AVDNQPQVQI | KVMQGEREMA | ADNKNLGEFD | LVGIPSAPRG | [ 450 ] |
| Cmhsp70-2   | PTKKSQVFST | AADNQTVQGI | KVLQGERPMA | AENKLLGQFD | LVGIPPAPRG | [ 450 ] |
| ScSCECM10   | PNKKSQIFST | AASGQTSVEV | KVFQGERELV | KDNKLIGNFT | LAGIPPAPKG | [ 450 ] |
| ScSSC1      | PTKKSQIFST | AAAGQTSVEI | RVFQGERELV | RDNKLIGNFT | LAGIPPAPKG | [ 450 ] |
| Orshsp70-8  | PTSKSEVFST | AADGQTSVEI | NVLQGEREFV | RDNKSLGSFR | LDGIPPAPRG | [ 450 ] |
| Orshsp70-7  | PTSKSEVFST | AADGQTSVEI | NVLQGEREFV | RDNKSLGSFR | LDGIPPAPRG | [ 450 ] |
| Athsp70-6   | PTSKSEVFST | AADGQTSVEI | NVLQGEREFV | RDNKSLGSFR | LDGIPPAPRG | [ 450 ] |
| Athsp70-7   | PTSKSEVFST | AADGQTSVEI | NVLQGEREFV | RDNKSIGSFR | LDGIPPAPRG | [ 450 ] |
| Cchsp70-1   | PTRKTEIYST | AVDNQTNVEI | HVLQGERELA | KDNKSLGTFR | LDGIPPAPRG | [ 450 ] |
| Cmhsp70-1   | PTRKTEIYST | AVDNQTNVEI | HVLQGERELA | KDNKSLGTFR | LDGIPPAPRG | [ 450 ] |
| Athsp70-8   | PTKKSQVFST | AADNQMQVGI | KVLQGEREMA | ADNKVLGEFD | LVGIPPAPRG | [ 450 ] |
| Crhsp70-1   | PTSKSEVFST | AADGQTSVEI | NVLQGEREFA | RDNKSLGTFR | LDGIPPAPRG | [ 450 ] |
| Gthsp70-1   | PTKKSEIFST | AVDNQPNVEI | HVLQGEREFT | KDNKSLGTFR | LDGIMPAPRG | [ 450 ] |
| Guthsp70-1  | PTKKSEVFST | AVDNQPNVEI | HVLQGEREFA | KDNKSLGTFR | LDGILPAPRG | [ 450 ] |
| Olhsp70-1   | PTSKSEVFST | AADGQTSVEI | NVLQGEREFV | KDNKSLGNFR | LDGIPSAPRG | [ 450 ] |
| Oshsp70-1   | PVKKSEMFST | AVENQTNVEI | HVLQGERELV | AGNKSLGNFR | LDGIPAAERG | [ 450 ] |
| Pfhsp70-1   | PAKKSQIFST | YADNQPGVLI | QVYEGERALT | KDNHLLGKFE | LDGIPPAPRK | [ 450 ] |
| Phhsp70-1   | PTKKSEVFST | AVDNQPNVEI | QVLQGERELT | KDNKSLGTFR | LDGIMPAPRG | [ 450 ] |
| Pophsp70-1  | PTKKSEVFST | AVDNQPNVEI | QVLQGERELT | KDNKSLGTFR | LDGIMPAPRG | [ 450 ] |
| Poyhsp70-1  | PTKKSEVFST | AVDNQPNVEI | QVLQGERELT | KDNKSLGTFR | LDGIMPAPRG | [ 450 ] |
| Pyhsp70-2   | PAKKSQIFST | YADNQPGVLI | QVYEGERALT | KDNHLLGKFE | LDGIPPAPRK | [ 450 ] |
| SyDnaK1     | PTSRSEVFST | AVDQTSVEI  | HVIQGERAMA | RDNKSLGKFL | LAGIPPAPRG | [ 450 ] |



|             |            |            |            |            |            |         |
|-------------|------------|------------|------------|------------|------------|---------|
| SynDnaK2    | PTKKSETFST | AVDGQSNEI  | HVLQGEREMA | NDNKSLGTFR | LDGIPPAPRG | [ 450 ] |
| SynDnaK3    | PVRKSDIFST | GENNQTVVEV | HVLQGEREMA | SDNISLGRFK | LSGIPPAPRG | [ 450 ] |
| Tphsp70-1   | PVKKSELFST | AADNQTNVEI | HVLQGEREVV | SGNKSLGNFK | LEGIPQAPKG | [ 450 ] |
| Athsp70-1   | VPQITVCFDI | DANGILNVSA | EDKTTGQKNK | ITITNDKGRL | SKDEIEKMOV | [ 500 ] |
| Athsp70-2   | VPQITVCFDI | DANGILNVSA | EDKTTGKKNK | ITITNDKGRL | SKEDIEKMOV | [ 500 ] |
| Athsp70-3   | VPQITVCFDI | DANGILNVSA | EDKTTGQKNK | ITITNDKGRL | SKDEIEKMOV | [ 500 ] |
| Athsp70-4   | VPQITVCFDI | DANGILNVSA | EDKTTGQKNK | ITITNDKGRL | SKEEIEKMOV | [ 500 ] |
| Athsp70-5   | VPQINVCFDI | DANGILNVSA | EDKTAGVKNQ | ITITNDKGRL | SKEEIEKMOV | [ 500 ] |
| Orshsp70-5  | VPQITVCFDI | DANGILNVSA | EDKTTGQKNK | ITITNDKGRL | SKEEIEKMOV | [ 500 ] |
| Orshsp70-3  | VPQINVCFDI | DANGILNVSA | EDKTTGQKNK | ITITNDKGRL | SKEEIEKMOV | [ 500 ] |
| Orshsp70-6  | VPQITVCFDI | DANGILNVSA | EDKTTGQKNK | ITITNDKGRL | SKEEIEKMOV | [ 500 ] |
| Orshsp70-1  | VPQINVTFDI | DANGILNVSA | EDKTTGKKNK | ITITNDKGRL | SKEEIERMOV | [ 500 ] |
| Crhsp70-3   | VPQINVIFDI | DANGILNVSA | EDKTTGNKNK | ITITNDKGRL | SKDEIERMOV | [ 500 ] |
| Olhsp70-4   | VPQINVCFDI | DANGILNVSA | EDKSGSQKNK | ITITNDKGRL | SKEDIERMVQ | [ 500 ] |
| Othsp70-5   | -----L     | NAR-----   | -----      | ---TCSST-V | AHLDVG---- | [ 500 ] |
| Tphsp70-4   | QPQIDVIFDM | DANGILNVSA | LEKSTGKENK | ITITNDKGRL | SQEEIERMOV | [ 500 ] |
| Pfhs70-2    | VPKIEVTFV  | DKNGILHVEA | EDKGTGKSRG | ITITNDKGRL | SKEQIEKMIN | [ 500 ] |
| ScSSA1      | VPQIEVTFDV | DSNGILNVSA | VEKGTGKSNK | ITITNDKGRL | SKEDIEKMVA | [ 500 ] |
| ScSSA2      | VPQIEVTFDV | DSNGILNVSA | VEKGTGKSNK | ITITNDKGRL | SKEDIEKMVA | [ 500 ] |
| ScSSA3      | VPQIDVTFDI | DANGILNVSA | LEKGTGKSNK | ITITNDKGRL | SKDDIDRMVS | [ 500 ] |
| ScSSA4      | VPQIEVTFDI | DANGILNVSA | VEKGTGKSNK | ITITNDKGRL | SKEDIDKMVA | [ 500 ] |
| Cmhs70-3    | VPQIEVTFDL | DANGILNVTA | VDKTTGKSER | IAIKNEKGR  | SEAEVERMVK | [ 500 ] |
| Pyhs70-3    | VPQIEVTFDV | DANAIINISA | IDKMTNKKQQ | ITIQSSGG-L | SKEEIEKMOV | [ 500 ] |
| Athsp70-11  | TPQIEVTFEV | DANGILNVKA | EDKASGKSEK | ITITNEKGR  | SQEEIDRMVK | [ 500 ] |
| Athsp70-12  | VPQIEVTFEV | DANGILQVKA | EDKVAKTSQS | ITITNDKGRL | TEEEIEEMIR | [ 500 ] |
| Athsp70-13  | IPQFTVCFDI | DSNGILNVSA | EDKATGKKNK | ITITNDKGRL | SKDDIEKMOV | [ 500 ] |
| Crhs70-4    | TPQIEVTFEV | DANGILTVSA | QDKGTGKKEK | ITITAEKGR  | SQDDIERMVK | [ 500 ] |
| Crhs70-5    | TPQIEVTFEV | DANGILNVAA | EDKGTGKKEK | ITITAEKGR  | SQDDIERMVK | [ 500 ] |
| Olhsp70-3   | VPQIEVTFEI | DANGILNVGA | EDKGTGKSEK | ITITNDKGRL | SQEEIERMVE | [ 500 ] |
| Othsp70-1   | VPQIEVTFEI | DANGILNVGA | EDKGTGKSEK | ITITNDKGRL | SQEEIERMVE | [ 500 ] |
| SCKAR2      | VPQIEVTFAL | DANGILKVSA | TDKGTGKSES | ITITNDKGRL | TQEEIDRMVE | [ 500 ] |
| Orshsp70-15 | APQIEVTFEV | DANGILSVLA | ADKATGRSEK | ITISGDDRKI | SQEEIDRMVR | [ 500 ] |
| Orshsp70-16 | APQIAVTFEV | DANGILSVLA | ADKATGRSEK | ITISGDDRKI | SQEEIDRMVR | [ 500 ] |
| Orshsp70-14 | APQIEVAFEV | DADGILSVSA | ADRATGRSER | ITISGDDRKT | SREEIDRMLG | [ 500 ] |
| Orshsp70-13 | VPQIEVTFEV | DENGILHVTA | SDKAAGRSKS | ITITNDKGRL | SQEEIDRMVR | [ 500 ] |
| Orshsp70-12 | TPQIEVTFEV | DANGILNVKA | EDKGTGKSEK | ITITNEKGR  | SQEEIDRMVR | [ 500 ] |
| Cmhs70-4    | VPQIEVTFEI | DANGILQVSA | EEKTAGKREK | ITIRNDKGRL | KDEEIQRMVR | [ 500 ] |
| Orshsp70-2  | VPQITVCFDI | DANGILNVSA | EDKTTGQKNK | ITITNDKGRL | SKEDIEKMOV | [ 500 ] |
| Tphsp70-5   | VPQIEVSFEV | DANGILQVSA | EDKGTGKAEK | ITITAEKGR  | SEEDIERMVR | [ 500 ] |
| Olhsp70-5   | EPKIDVTFEV | NTNGLLTVTA | KDRVTVGEAN | VSLQHDRGR  | TAEIEERMCA | [ 500 ] |
| Pfhs70-3    | VPQIEVTFDV | DANAIINISA | IDKMTNKKQQ | ITIQSSGG-L | SKEEIEKMOV | [ 500 ] |
| Pyhs70-1    | VPKIEVTFV  | DKNGILHVEA | EDKGTGKSKG | ITITNDKGRL | SKEQIEKMIN | [ 500 ] |
| SCSSB1      | EPVLEAIFEV | DANGILKVTA | VEKSTGKSSN | ITISNAVGR  | SSEEIEKMVN | [ 500 ] |
| SCSSB2      | EPVLEAIFEV | DANGILKVTA | VEKSTGKSSN | ITISNAVGR  | SSEEIEKMVN | [ 500 ] |
| Tphsp70-3   | EPKVDVTFAL | DANGILNVSA | RDQVTGAEAR | AEIKAKEGR  | TSDDIDKMIE | [ 500 ] |
| Othsp70-2   | EPKIDVTFEV | NTNGLLTVTA | KDRVTVGEAN | VSLQHDRGR  | TAEIEERMCA | [ 500 ] |
| Othsp70-4   | VPQINVCFDI | DANGILNVSA | EDKASGQKNK | ITITNDKGRL | SKEEIERMOV | [ 500 ] |

|             |            |            |            |            |            |         |
|-------------|------------|------------|------------|------------|------------|---------|
| EcoliDnaK   | MPQIEVTFDI | DADGILHVSA | KDKNSGKEQK | ITIKASSG-L | NEDEIQKMVR | [ 500 ] |
| Orshsp70-9  | MPQIEVTFDI | DANGIVTVSA | KDKSTGKEQQ | ITIRSSGG-L | SEAEIQKMVQ | [ 500 ] |
| Orshsp70-11 | MPQIEVTFDI | DANGIVKVSA | KDKSTGKEQE | ITIKSSGG-L | SESDIEKMVR | [ 500 ] |
| Orshsp70-10 | MPQIEVTFDI | DANGIVTVSA | KDKATGKEQQ | ITIRSSGG-L | SEAEIQKMH  | [ 500 ] |
| Athsp70-10  | TPQIEVTFEV | DANGILNVKA | EDKASGKSEK | ITITNEKGRL | SQEEIDRMVK | [ 500 ] |
| Athsp70-9   | VPQIEVTFDI | DANGIVTVSA | KDKTTGKVQQ | ITIRSSGG-L | SEDDIQKMVR | [ 500 ] |
| Orshsp70-4  | VPQITVCFDI | DANGILNVSA | EDKTTGQKNK | ITITNDKGRL | SKEEIEKMVQ | [ 500 ] |
| Crhsp70-2   | VPQVEVTFDI | DANGIVHVSA | KDKATGKEQS | VRIQSSGG-L | SDDQINQMVR | [ 500 ] |
| Olhsp70-2   | VPQIEVTFDI | DANGIVNVSA | KDKATNKEQK | VTIQSSGG-L | SDADIEQMVR | [ 500 ] |
| Othsp70-3   | VPQIEVTFDI | DANGIVNVSA | KDKATGKEQK | VTIQSSGG-L | SDSDIENMVR | [ 500 ] |
| Tphsp70-2   | VPQIEVSFDI | DADGILNVSA | KDKGTGKEQN | IIIKSCGG-L | SDDDIERMVR | [ 500 ] |
| Cmhs70-2    | VPQIEVIFDI | DANGILHVSA | VDKGTGKRNE | VVITSSGG-L | SNEEIEKMIK | [ 500 ] |
| ScECM10     | TPQIEVTFDI | DANGIINVSA | KDLASHKDSS | ITVAGASG-L | SDTEIDRMVN | [ 500 ] |
| ScSSC1      | VPQIEVTFDI | DADGIINVSA | RDKATNKDSS | ITVAGSSG-L | SENEIEQMVN | [ 500 ] |
| Orshsp70-8  | VPQIEVKFDI | DANGILSVSA | VDKGTGKKQD | ITITGAST-L | PKDEVEKMVE | [ 500 ] |
| Orshsp70-7  | VPQIEVKFDI | DANGILSVAA | IDKGTGKKQD | ITITGAST-L | PKDEVERMVE | [ 500 ] |
| Athsp70-6   | VPQIEVKFDI | DANGILSVSA | VDKGTGKKQD | ITITGAST-L | PKDEVDQMVO | [ 500 ] |
| Athsp70-7   | VPQIEVKFDI | DANGILSVSA | SDKGTGKKQD | ITITGAST-L | PKDEVDTMVQ | [ 500 ] |
| Cchsp70-1   | VPQIEVTFDI | DANGILSVTA | KEKTTGKQOS | VTITGAST-L | DKDEIQKIIK | [ 500 ] |
| Cmhs70-1    | VPQIEVTFDI | DANGILSVTA | KERSTGKQOS | ITITGAST-L | DQSEIERMVK | [ 500 ] |
| Athsp70-8   | MPQIEVTFDI | DANGITTVSA | KDKATGKEQN | ITIRSSGG-L | SDDEINRMVK | [ 500 ] |
| Crhsp70-1   | VPQIEVKFDI | DANGILSVTA | TDKGTSKKQD | IRITGAST-L | DKGDVERMVK | [ 500 ] |
| Gthsp70-1   | VPQIEVIFDI | DANGILSVKA | KDKGTGKEQS | ITITGAST-L | PKEEVEKLVK | [ 500 ] |
| Guthsp70-1  | VPQIEVTFDI | DANGILSVTA | KDKGTGKEQS | ITITGAST-L | PSDEVERMVN | [ 500 ] |
| Olhsp70-1   | VPQIEVKFDI | DANGILSVEA | CDKGTGKKQD | IKITGAST-L | SSDEVDRMVA | [ 500 ] |
| Oshsp70-1   | VPQIEVTFDI | NVDGLLSVKA | KELETGIEQS | VTIQGASN-L | DESEVSDMLA | [ 500 ] |
| Pfhs70-1    | VPQIEVTFDI | DANGILNVTA | VEKSTGKQNH | ITITNDKGRL | SQDEIDRMVN | [ 500 ] |
| Phhs70-1    | VPQIEVTFDI | DANGILSVKA | KEKATGKEQS | ITISGAST-L | PKDDVERMVK | [ 500 ] |
| Pophsp70-1  | VPQIEVTFDI | DANGILSVKA | KEKATGKEQS | ITISGAST-L | PKDDVERMVK | [ 500 ] |
| Poyhsp70-1  | VPQIEVTFDI | DANGILSVKA | KEKATGKEQS | ITISGAST-L | PKDDVERMVK | [ 500 ] |
| Pyhsp70-2   | VPQIEVTFDI | DANGILNVTA | VEKSTGKQNH | ITITNDKGRL | SPEEIDRMVN | [ 500 ] |
| SyDnaK1     | MPQIEVSFEI | DVNGILKVSA | QDQGTGKEQS | IVISHTGG-L | SGGEIEKMRQ | [ 500 ] |
| SynDnaK2    | VPQIEVTFDI | DANGILNVTA | KDRGTGKEQS | ISITGAST-L | PDTEVDRMVK | [ 500 ] |
| SynDnaK3    | VPQVQVSFDI | DANGILQVTA | RDKTTGREQS | ITVQGASI-L | SEGEVNRMIQ | [ 500 ] |
| Tphsp70-1   | KPQIEVTFDI | NVDGILSVTA | KENESGKEQN | VTIQGASN-L | SESEVNDMLE | [ 500 ] |

|            |            |            |            |            |            |         |
|------------|------------|------------|------------|------------|------------|---------|
| Athsp70-1  | EAEKYKSEDE | EHHKKVEAKN | ALENYAYNMR | NTIQDEK-KL | PAADKKKIED | [ 550 ] |
| Athsp70-2  | EAEKYKSEDE | EHHKKVEAKN | ALENYAYNMR | NTIRDEK-KL | PAADKKKVED | [ 550 ] |
| Athsp70-3  | EAEKYKSEDE | EHHKKVDAKN | ALENYAYNMR | NTIRDEK-KL | AGDDKKKIED | [ 550 ] |
| Athsp70-4  | EAEKYKAEDE | EHHKKVDAKN | ALENYAYNMR | NTIKDEK-KL | DAADKKKIED | [ 550 ] |
| Athsp70-5  | DAEKYKAEDE | QVKKKVEAKN | SLENYAYNMR | NTIKDEK-KL | TQEDKQKIEK | [ 550 ] |
| Orshsp70-5 | EAEKYKSEDE | EHHKKVESKN | ALENYAYNMR | NTIKDEK-KL | PAADKKKIED | [ 550 ] |
| Orshsp70-3 | EAEKYKAEDE | EHHKKVDAKN | ALENYAYNMR | NTIKDEK-KL | AADDKKRIED | [ 550 ] |
| Orshsp70-6 | DAEKYKSEDE | EHHKKVDAKN | SLENYAYNMR | NTIQDEK-KL | PADDKKKIED | [ 550 ] |
| Orshsp70-1 | EAEKYKAEDE | QVRHKVEARN | ALENYAYNMR | NTVRDEK-KL | PADDKKKIED | [ 550 ] |
| Crhsp70-3  | EAEKYKADDE | QLKKKVEAKN | SLENYAYNMR | NTIREDK-QL | SASDKESMEK | [ 550 ] |
| Olhsp70-4  | DAEKYKAEDE | EHHKKIEAKN | AVENYAYNMR | NTMNDTN-KL | DADDKKTIED | [ 550 ] |
| Othsp70-5  | -----      | ----SAFEPT | SASHMLVQ-- | -----      | -----      | [ 550 ] |

|             |            |             |            |             |            |         |
|-------------|------------|-------------|------------|-------------|------------|---------|
| Tphsp70-4   | EAEQYKAEDD | ANKNRVESKN  | GLENYCYSLK | SSIEGEE-KI  | PEGDKTKLLD | [ 550 ] |
| Pfhsp70-2   | DAEKFADEDK | NLREKVEAKN  | NLDNYIQSMK | ATVEDKDKKI  | EKEDKNTILS | [ 550 ] |
| ScSSA1      | EAEKFKEEDE | KESQRIASKN  | QLESIAYSLK | NTISEAG-KL  | EQADKDTVTK | [ 550 ] |
| ScSSA2      | EAEKFKEEDE | KESQRIASKN  | QLESIAYSLK | NTISEAG-KL  | EQADKDAVTK | [ 550 ] |
| ScSSA3      | EAEKYRADDE | REAERVQAKN  | QLESYAFTLK | NTINEAS-KV  | GEDDAKRLET | [ 550 ] |
| ScSSA4      | EAEKFKAEDE | QEAQRVQAKN  | QLESYAFTLK | NSVSENN-KV  | GEEDARKLEA | [ 550 ] |
| Cmhsp70-3   | EAEAMKAKDE | EVRRTVEARN  | SLEQLAYSAL | RTVEEEQ-SL  | SAGDKQKILD | [ 550 ] |
| Pyhsp70-3   | EAELNREKDQ | HKKNLTDSKN  | EAETLIYSSE | KQLDDFKDKI  | SDSDKEELKQ | [ 550 ] |
| Athsp70-11  | EAEFFAEEDK | KVKEKIDARN  | ALETYVYNMK | NQVSDKDKKL  | EGDEKEKIEA | [ 550 ] |
| Athsp70-12  | EAEFFAEEDK | IMKEKIDARN  | KLETYVYNMK | STVADKEKKI  | SDEDKEKMEG | [ 550 ] |
| Athsp70-13  | EAEKYKSEDE | EHKKKVEAKN  | GLENYAYNVG | NTLRD---KL  | PAADKKKFED | [ 550 ] |
| Crhsp70-4   | EAEFFAEQDK | AVKAKIDARN  | QLETYCYNMK | NTVEDK--KI  | EEEDKEKITA | [ 550 ] |
| Crhsp70-5   | EAEFFAEQDK | AVKAKIDARN  | QLETYCYNMK | STVEDK--KI  | EEEDKEKITA | [ 550 ] |
| Olhsp70-3   | EAEFFAEEDR | KTAKERIDSRN | SLETFAYNMK | NTISDSDKKL  | DDDDKNTIEE | [ 550 ] |
| Othsp70-1   | EAEFFAEEDR | KTAKERIDSRN | SLETFAYNMK | NTVSDSDKKL  | EEDDKSTIEE | [ 550 ] |
| ScKAR2      | EAEKFAEDA  | SIKAKVESRN  | KLENYAHSLK | NQVNGD--KL  | EEEDKETLLD | [ 550 ] |
| Orshsp70-15 | EAEFFAEEDR | RHREQVDARN  | SLEAYVYNIK | N-TLGGK-AM  | EGEEKDKVEE | [ 550 ] |
| Orshsp70-16 | EAEFFAEDER | RHREQVDARN  | SLEAYVYVVK | S-TLGGK-AM  | EGEEKEKVEE | [ 550 ] |
| Orshsp70-14 | EAEFFAEDER | RHRERAGARN  | SLEAYVYGVK | NAVVGGE-AM  | DGGEKEKVEA | [ 550 ] |
| Orshsp70-13 | EAEFFAEDER | RVRERVDARN  | RLENYVYRMR | SAVRDGG-KI  | GDDDRERMES | [ 550 ] |
| Orshsp70-12 | EAEFFAEEDK | KVKERIDARN  | QLETYVYNMK | NTVGDKDKKL  | ESEEKEKVEE | [ 550 ] |
| Cmhsp70-4   | EAEYYAEVDA | KLKRKVDAKN  | NFENYIYQVR | QMYEDKD-KL  | STDDIDKDKD | [ 550 ] |
| Orshsp70-2  | EAEKYKAEDE | EHKKKVDAKN  | SLENYAYNMR | NTIKDDK-KL  | PEADKKKIED | [ 550 ] |
| Tphsp70-5   | EAEFFAEEDK | KVKERIDARN  | GLESYLYNLK | NTLDDDE-NI  | SAEDKKELQD | [ 550 ] |
| Olhsp70-5   | EAEAMAEEDE | RLARMREYEG  | TD-----    | -----       | -----      | [ 550 ] |
| Pfhsp70-3   | EAELNREKDQ | LKKNLTDSKN  | EAETLIYSSE | KQLEDFKDKI  | SDSDKDELRO | [ 550 ] |
| Pyhsp70-1   | DAEKFADEDK | NLREKVESKN  | NLDNYIQSMK | ATVEDKDKKI  | EKEDKDTILN | [ 550 ] |
| ScSSB1      | QAEEFKAADE | AFAKKHEARQ  | RLESYVASIE | QTVTDPV-KL  | KRGSKSKIEA | [ 550 ] |
| ScSSB2      | QAEEFKAADE | AFAKKHEARQ  | RLESYVASIE | QTVTDPV-KL  | KRGSKSKIEA | [ 550 ] |
| Tphsp70-3   | DAEKYRAQDE | ELTEKTDYKA  | SLEALFTVQ  | SKVAETN---  | ----KSNEVK | [ 550 ] |
| Othsp70-2   | EAEAMAEEDE | RIAKMREYEG  | TD-----    | -----       | -----      | [ 550 ] |
| Othsp70-4   | DAEKFAEDE  | EHKKKIDAKN  | GLENYAYNMR | NTMSDAN-KL  | DAEDKKTIED | [ 550 ] |
| EcolidNaK   | DAEANAEADR | KFEELVQTRN  | QGDHLLHSTR | KQVEEAGDKL  | PADDKTAIES | [ 550 ] |
| Orshsp70-9  | EAELHSQKDQ | ERKALIDIRN  | NADTTIYSVE | KSLGEYRDKI  | PAEVATEIET | [ 550 ] |
| Orshsp70-11 | EAELHSQKDQ | ERKSLIDLKN  | SADTTIYSIE | KSVSEYKDKV  | PAEVTNEIQS | [ 550 ] |
| Orshsp70-10 | EAELHSQKDQ | ERKALIDIRN  | TADTTIYSIE | KSLGEYRDKI  | PAEVASEIET | [ 550 ] |
| Athsp70-10  | EAEFFAEEDK | KVKEKIDARN  | ALETYVYNMK | NQVNDKDKKL  | EGDEKEKIEA | [ 550 ] |
| Athsp70-9   | EAELHAQKDK | ERKELIDTKN  | TADTTIYSIE | KSLGEYREKI  | PSEIAKEIED | [ 550 ] |
| Orshsp70-4  | EAEKYKAEDE | EHKKKVDAKN  | ALENYAYNMR | NTIKDDK-KL  | SADDKKKIED | [ 550 ] |
| Crhsp70-2   | DAETYAEKDK | TRKELIEAKN  | EADTAIYTTE | KSLAEYKSKL  | PQAVVDEIQK | [ 550 ] |
| Olhsp70-2   | DAESHAESDK | QRKELIEVRN  | EADTLVYSAD | KNLSEHGDKL  | PQDVKDAITN | [ 550 ] |
| Othsp70-3   | DAEAHADADK | KRKEMIEIKN  | EADTLIYSAD | KNLSEHGANKL | PQDVKDAITN | [ 550 ] |
| Tphsp70-2   | DAEVNADADA | KKKQVIESKN  | EIDSLIYSTE | KSVKEHADKL  | SEEVKTEVEK | [ 550 ] |
| Cmhsp70-2   | DAEMHAEEDR | RRQAAVEAKN  | EADSLLYTTE | RTLSEHRAKL  | SATDVETVEK | [ 550 ] |
| ScECM10     | EAERYKNQDR | ARRNAIETAN  | KADQLANDTE | NSIKEFEGKL  | DKTDSQRLKD | [ 550 ] |
| ScSSC1      | DAEKFKSQDE | ARKQAIETAN  | KADQLANDTE | NSLKEFEGKV  | DKAEAQKVRD | [ 550 ] |
| Orshsp70-8  | EAEKFAEKDK | EKRDAIDTKN  | QAESVIYQTE | KQLKELGDKV  | PGDVKGKVEA | [ 550 ] |
| Orshsp70-7  | EADKFAQEDK | EKRDAIDTKN  | QADSVVYQTE | KQLKELGDKV  | PAPVKEKVDA | [ 550 ] |

|            |             |             |            |             |            |         |
|------------|-------------|-------------|------------|-------------|------------|---------|
| Athsp70-6  | EAERFAKDDK  | EKRDAIDTKN  | QADSVVYQTE | KQLKELGEKI  | PGEVKEKVEA | [ 550 ] |
| Athsp70-7  | EAERFAKEDK  | EKRDAIDTKN  | QADSVVYQTE | KQLKELGEKI  | PGPVKEKVEA | [ 550 ] |
| Cchsp70-1  | EAEINAQEDR  | KKKENIELKN  | QAETICYQAO | KQLNEFKKEKI | DKNQYKRIED | [ 550 ] |
| Cmhsp70-1  | EAEKNAEEDR  | KKREQIETKN  | LAESVYQAE  | KMG-----    | -----LKD   | [ 550 ] |
| Athsp70-8  | EAELENAQKDQ | EKKQLIDLKN  | SADTTIYSVE | KSLSEYREKI  | PAEIASEIET | [ 550 ] |
| Crhsp70-1  | EAEKFAGEDK  | KRRESVETKN  | QAETMVYQTE | KQLKEFEGKV  | PADIKAKVEA | [ 550 ] |
| Gthsp70-1  | EAEENSELDK  | HKREQIDLKN  | QADALCYQSQ | NQINELKDKI  | SEDEKQNVQK | [ 550 ] |
| Guthsp70-1 | EAQNSAKEDK  | EKRDKIDLKN  | QSDSLCYQSE | KQLKELEGKI  | DDTNKNKISS | [ 550 ] |
| Olhsp70-1  | DAEKFASEDA  | AKREQVEVRN  | SADSMVYQTE | KQVQELDEKI  | PQDVKEKVLE | [ 550 ] |
| Oshsp70-1  | EAEKYAALNK  | EKRQNLIDLKN | QAETLCFEAE | KELDLFKTSI  | PEEKQQNVQK | [ 550 ] |
| Pfhsp70-1  | DAEKYKAEDE  | ENRKRIEARN  | SLENYCYGVK | SSLEDQK-KL  | QPAEIETCMK | [ 550 ] |
| Phhsp70-1  | EAEENFDTDQ  | KRRKNIDTKN  | QAESLCYQAE | KQIKEFEDKI  | SQDLKTKIEE | [ 550 ] |
| Pophsp70-1 | EAEENFDVDQ  | KRRKNIDIRN  | QAESLCYQSE | KQVKEFEDKI  | DEELKNRITN | [ 550 ] |
| Poyhsp70-1 | EAEENFDTDQ  | KRRKNIDTKN  | QAESLCYQAE | KQVKEFEDKI  | SQDLKIKIEE | [ 550 ] |
| Pyhsp70-2  | DAEKYKAEDE  | ENKKRIEARN  | SLENYCYGVK | SSLEDQK-KL  | QPNEVETCMK | [ 550 ] |
| SyDnaK1    | EAQQYAAQDQ  | LRLRMELQN   | QADSLFHTYE | TTLQESGELV  | REELKSSGKQ | [ 550 ] |
| SynDnaK2   | EAESNAAADK  | ERREKIDRKN  | QADSLVYQAE | KQITELGDKV  | PAADKIKAEK | [ 550 ] |
| SynDnaK3   | EAETFAAQDR  | ERRERIEKRN  | SAKALTDQAO | RRLKEVTLAF  | TVSYRRQVDA | [ 550 ] |
| Tphsp70-1  | EAEKYAVIDK  | EQKEKSEMVV  | SATAYCDEVE | KKLNSGEMEC  | TTEEEEEIKN | [ 550 ] |

|            |            |             |            |       |         |
|------------|------------|-------------|------------|-------|---------|
| Athsp70-1  | SIEQAIQWLE | GNQLAEAEDEF | EDKMKELESI | CNPII | [ 585 ] |
| Athsp70-2  | SIEEAIQWLD | GNQLGEAEDEF | EDKMKELESV | CNPII | [ 585 ] |
| Athsp70-3  | SIEAAIEWLE | ANQLAEAEDEF | EDKMKELESI | CNPII | [ 585 ] |
| Athsp70-4  | AIDQAIQWLD | GNQLAEAEDEF | EDKMKELESL | CNPII | [ 585 ] |
| Athsp70-5  | AIDETIEWIE | GNQLAEVDEF  | EYKLKELEGI | CNPII | [ 585 ] |
| Orshsp70-5 | AIDQAIQWLD | GNQLAEAEDEF | DDKMKELEGI | CNPII | [ 585 ] |
| Orshsp70-3 | AIDGAISWLD | TNQLAEAEDEF | EDKMKELEGI | CNPII | [ 585 ] |
| Orshsp70-6 | AVEQAIQWLD | NNQLAEVEEF  | EDKMKELEGL | CNPII | [ 585 ] |
| Orshsp70-1 | AIEDAIKWLD | GNQLAEAEDEF | EDKMKELESL | CNPII | [ 585 ] |
| Crhsp70-3  | ALTAAMDWLE | ANQMAEVEEF  | EHHLKELEGV | CNPII | [ 585 ] |
| Olhsp70-4  | AVEAAITWLD | GNQTAEVDEF  | EDKLKELEGV | CNPII | [ 585 ] |
| Othsp70-5  | -----      | -----       | -----      | ----- | [ 585 ] |
| Tphsp70-4  | AIAETTAWLD | ANQTAEEKEEF | EEKQKALEAI | AMPIL | [ 585 ] |
| Pfhsp70-2  | AVKDAEDWLN | NNSNADSEAL  | KQKLDLEAV  | CQPII | [ 585 ] |
| ScSSA1     | KAETISWLD  | SNTTASKEEF  | DDKLKELQDI | ANPIM | [ 585 ] |
| ScSSA2     | KAETIAWLD  | SNTTATKEEF  | DDQLKELQEV | ANPIM | [ 585 ] |
| ScSSA3     | ASQETIDWLD | ASQAASTDEY  | KDRQKELEGI | ANPIM | [ 585 ] |
| ScSSA4     | AAQDAINWLD | ASQAASTEY   | KERQKELEGV | ANPIM | [ 585 ] |
| Cmhsp70-3  | KTKEVLEWLE | ENATASLDQI  | KNMQKELESV | TMPIF | [ 585 ] |
| Pyhsp70-3  | KISALREKLT | --DD--LDSI  | KDATKQLQEK | SWAIS | [ 585 ] |
| Athsp70-11 | ATKEALEWLD | ENQNSEKEEY  | DEKLKEVEAV | CNPII | [ 585 ] |
| Athsp70-12 | VLKEALEWLE | ENVNAEKEDY  | DEKLKEVELV | CDPVI | [ 585 ] |
| Athsp70-13 | SIEEVIQWLD | DNQLAEAEDEF | EHKMKELESV | WSTII | [ 585 ] |
| Crhsp70-4  | AVKEALEWLD | ENPDADTSEY  | KDRLKEVEDV | CNPII | [ 585 ] |
| Crhsp70-5  | AVKEALEWLD | ENPDAEPDEY  | KDKLKEVEDV | CNPII | [ 585 ] |
| Olhsp70-3  | AVKETLDWLD | ENQSAEKEDY  | DEQLKQLEEV | CNPV  | [ 585 ] |
| Othsp70-1  | AVKEALDWLD | DNQSAEKDDY  | DEQLKKLEEV | CNPV  | [ 585 ] |
| ScKAR2     | AANDVLEWLD | DNETAIAEDF  | DEKFESLSKV | AYPIT | [ 585 ] |

|             |            |             |            |       |         |
|-------------|------------|-------------|------------|-------|---------|
| Orshsp70-15 | AVREAYEWLD | GNPDAGKEEY  | EEKLRELEDV | CNPVM | [ 585 ] |
| Orshsp70-16 | AVREAHEWLD | GNPDAGKEEY  | EEKLRELEDV | CNPVM | [ 585 ] |
| Orshsp70-14 | AVMEAYEWLD | GNQDVGKEEY  | EEKLRELEDV | CNPVM | [ 585 ] |
| Orshsp70-13 | ALTEALEWLE | DNRTAEKEDY  | EEKLKEVEQV | CGPII | [ 585 ] |
| Orshsp70-12 | ALKEALEWLD | ENQTAEKEEY  | EEKLKEVEAV | CNPII | [ 585 ] |
| Cmhsp70-4   | SVESAQDWLD | EHEASDAAAI  | EERMKAFQDV | VQPII | [ 585 ] |
| Orshsp70-2  | AIDGAISWLD | SNQLAEAEFEF | EDKMKELEGV | CNPII | [ 585 ] |
| Tphsp70-5   | IVDETLDWME | ENEA-DKEDY  | DGKQKEVENI | ANPIM | [ 585 ] |
| Olhsp70-5   | -----      | -----       | -----      | ----- | [ 585 ] |
| Pfhsp70-3   | KITVLREKLT | --ED--LDSI  | KDATKQLQEK | SWAIS | [ 585 ] |
| Pyhsp70-1   | AIKEAEDWLN | NNSNADSEAL  | KQKLDVEAI  | CQPII | [ 585 ] |
| ScSSB1      | ALSDALAALQ | IE-DPSADEL  | RKAEVGLKRV | VTKAM | [ 585 ] |
| ScSSB2      | ALSDALAALQ | IE-DPSADEL  | RKAEVGLKRV | VTKAM | [ 585 ] |
| Tphsp70-3   | ELADLMDWLE | LDDTATLEDM  | KKRGRIVEDT | WGIIV | [ 585 ] |
| Othsp70-2   | -----      | -----       | -----      | ----- | [ 585 ] |
| Othsp70-4   | AVEAAITWLD | GNQTAEVDEF  | EDKLKELEGV | CNPII | [ 585 ] |
| EcolidNaK   | ALTALETALK | --ED--KAAI  | EAKMQELAQV | SQKLM | [ 585 ] |
| Orshsp70-9  | AIADLRVMT  | --DD--IEKI  | KANIEAANKA | VSKIG | [ 585 ] |
| Orshsp70-11 | AVSDLRAAMA | --DD--LEKI  | KQKLEAANKA | VSKIG | [ 585 ] |
| Orshsp70-10 | AIADLRNEMA | --DD--IEKI  | KSKIEAANKA | VSKIG | [ 585 ] |
| Athsp70-10  | ATKEALEWLD | ENQNSEKEEY  | DEKLKEVEAV | CNPII | [ 585 ] |
| Athsp70-9   | AVADLRSASS | --DD--LNEI  | KAKIEAANKA | VSKIG | [ 585 ] |
| Orshsp70-4  | AIDGAINWLD | SNQLAEAEDEF | EDKMKELESI | CNPII | [ 585 ] |
| Crhsp70-2   | AITECRAASQ | --ED--LPDL  | KAKIQALSTA | SMKIG | [ 585 ] |
| Olhsp70-2   | AQAEVRSAAE | --ED--LAKL  | REAINGLQQA | VMKIG | [ 585 ] |
| Othsp70-3   | AQADVRTASE | --ED--VEKL  | REAINALQKA | VMKIG | [ 585 ] |
| Tphsp70-2   | AIEEARLVKD | --DD--LDEL  | KAKTEALSQA | SMKMG | [ 585 ] |
| Cmhsp70-2   | AAQDLRAVLE | --DATAADTI  | REKTKVLQQA | AMRIG | [ 585 ] |
| ScECM10     | QISSLRELVS | RSDEVNDDDV  | GTKIDNLRTS | SMKLF | [ 585 ] |
| ScSSC1      | QITSLKELVA | RVEEVNAEEL  | KTKTEELQTS | SMKLF | [ 585 ] |
| Orshsp70-8  | KLTELKDAVA | --GST--QTM  | KDALAALNQE | VMQLG | [ 585 ] |
| Orshsp70-7  | KLNELKEAIA | --GST--QSM  | KDAMAALNEE | VMQIG | [ 585 ] |
| Athsp70-6   | KLQELKDKIG | --GST--QEI  | KDAMAALNQE | VMQIG | [ 585 ] |
| Athsp70-7   | KLQELKEKIA | --GST--QEI  | KDTMAALNQE | VMQIG | [ 585 ] |
| Cchsp70-1   | LIAKLKQAIS | --NEY--EEI  | KNLMEAIQKE | TMEIG | [ 585 ] |
| Cmhsp70-1   | NAQELKNAID | --LDY--EGM  | KNLTQQVQTL | IAQKA | [ 585 ] |
| Athsp70-8   | AVSDLRTAMA | --ED--VEDI  | KAKVEAANKA | VSKIG | [ 585 ] |
| Crhsp70-1   | KLGELKAALP | --DDA--EAT  | KAAMNALQQE | VMAMG | [ 585 ] |
| Gthsp70-1   | LIDSLKLSIQ | --DDY--EKI  | KDIQNQLQQV | MMNIG | [ 585 ] |
| Guthsp70-1  | MISELRNAIN | --ENY--DEM  | RDLNSKLQTA | LMDLG | [ 585 ] |
| Olhsp70-1   | KVAELKQAIA | --DDL--EKM  | KTAQEDLQQQ | VMAMG | [ 585 ] |
| Oshsp70-1   | LIENIRQDTQ | --DNF--ESL  | KLIVEELKMA | MKDMV | [ 585 ] |
| Pfhsp70-1   | TITILEWLE  | KNQLAGKDEY  | EAKQKEAESV | CAPIM | [ 585 ] |
| Phhsp70-1   | LITELRSSLE | --EEY--ENI  | ESISQRLQNS | LMDIG | [ 585 ] |
| Pophsp70-1  | LISELRSNLE | --EEL--DSI  | EANSEKLQNA | LMEIG | [ 585 ] |
| Poyhsp70-1  | LITELRSSLE | --EEY--DNI  | ESISQQLQNA | LMDIG | [ 585 ] |
| Pyhsp70-2   | SVTSILEWLE | KNQLAGKDEY  | EAKQKEAEAV | CSPIM | [ 585 ] |
| SyDnaK1     | KKDQLAIALR | --PNTPVEKL  | QTLVEEFRQI | ILLIG | [ 585 ] |

SynDnaK2 LIKDLKEAVA --EDD--AKI QTVMPPELQQV LYSIG [585]  
SynDnaK3 LCSEILDSLE --DDE--RRL DRAQADLQDV LYELN [585]  
Tphsp70-1 VIKTLREALS --ANY--ASI KESFEQLRTL TE--- [585]
